# Supplementary material for: Effects of Soybean Lecithin on Growth Performance, Intestine Morphology, and Liver Tissue Metabolism in Rock Bream (Oplegnathus fasciatus) Larvae
Source: Frontiers journal article supplement (doi:10.3389/fmars.2022.942259), 2022-07-11
Supplement: Table_2.XLSX [file Table_2.XLSX]

## Sheet: DEGs list
Gene_id	readcount_PL0	readcount_PL12	log2FoldChange	pval	padj	Blast swiss prot
Opl0050460.1	1.30336	63.84	-5.6142	0.00011639	0.0097823	gnl|BL_ORD_ID|273720 sp|P20393|NR1D1_HUMAN Nuclear receptor subfamily 1 group D member 1 OS=Homo sapiens OX=9606 GN=NR1D1 PE=1 SV=1//3.4055e-31
Opl0207830.1	19.1728	613.772	-5.0006	9.49e-05	0.0086839	-//-
Novel00742	1.97631	47.9413	-4.6004	4.41e-09	2.28e-06	-//-
Opl0210000.1	1.61414	29.8506	-4.2089	4.36e-09	2.28e-06	gnl|BL_ORD_ID|396417 sp|Q3SZ21|RPP30_BOVIN Ribonuclease P protein subunit p30 OS=Bos taurus OX=9913 GN=RPP30 PE=2 SV=1//2.23774e-101
Opl0059210.1	17.6106	292.987	-4.0563	1.74e-05	0.002257	gnl|BL_ORD_ID|48152 sp|A8WGA0|C27C1_DANRE Cytochrome P450 27C1 OS=Danio rerio OX=7955 GN=cyp27c1 PE=1 SV=2//2.40324e-17
Opl0017450.1	217.493	2902.33	-3.7382	0.00036899	0.023259	gnl|BL_ORD_ID|220523 sp|Q91ZP3|LPIN1_MOUSE Phosphatidate phosphatase LPIN1 OS=Mus musculus OX=10090 GN=Lpin1 PE=1 SV=1//0
Opl0079520.1	5.17974	64.2804	-3.6334	4.68e-13	8.44e-10	gnl|BL_ORD_ID|64050 sp|Q3TQ03|CIART_MOUSE Circadian-associated transcriptional repressor OS=Mus musculus OX=10090 GN=Ciart PE=1 SV=1//3.35725e-40
Opl0161460.1	1.29508	15.207	-3.5536	0.00015444	0.012347	-//-
Opl0091910.1	11.5264	121.882	-3.4025	1.19e-05	0.0016657	gnl|BL_ORD_ID|43260 sp|Q99PV5|BHE41_MOUSE Class E basic helix-loop-helix protein 41 OS=Mus musculus OX=10090 GN=Bhlhe41 PE=1 SV=1//5.53511e-129
Novel00013	1.64012	17.2619	-3.3957	3.24e-05	0.003603	hypothetical protein LOTGIDRAFT_176384 [Lottia gigantea]>gi|556114850|gb|ESP03502.1| hypothetical protein LOTGIDRAFT_176384 [Lottia gigantea]
Opl0130950.1	25.6791	269.536	-3.3918	1.81e-05	0.0022893	gnl|BL_ORD_ID|467630 sp|Q92172|TEF_CHICK Transcription factor VBP OS=Gallus gallus OX=9031 GN=TEF PE=1 SV=2//3.86601e-16
Opl0203900.1	21.4267	224.706	-3.3906	2.59e-12	3.64e-09	gnl|BL_ORD_ID|273720 sp|P20393|NR1D1_HUMAN Nuclear receptor subfamily 1 group D member 1 OS=Homo sapiens OX=9606 GN=NR1D1 PE=1 SV=1//5.49126e-68
Opl0056260.1	2.27881	23.4426	-3.3628	4.39e-05	0.0046435	-//-
Opl0003620.1	143.725	1473.28	-3.3576	6.26e-05	0.0062483	gnl|BL_ORD_ID|132987 sp|Q13451|FKBP5_HUMAN Peptidyl-prolyl cis-trans isomerase FKBP5 OS=Homo sapiens OX=9606 GN=FKBP5 PE=1 SV=2//0
Opl0213020.1	6.45769	63.3898	-3.2952	2.86e-11	3.3e-08	gnl|BL_ORD_ID|446270 sp|Q8TDR2|STK35_HUMAN Serine/threonine-protein kinase 35 OS=Homo sapiens OX=9606 GN=STK35 PE=1 SV=2//0
Opl0191160.1	9.13293	88.5577	-3.2775	2.3e-10	1.88e-07	gnl|BL_ORD_ID|64050 sp|Q3TQ03|CIART_MOUSE Circadian-associated transcriptional repressor OS=Mus musculus OX=10090 GN=Ciart PE=1 SV=1//9.40062e-28
Opl0028550.1	37.0289	317.086	-3.0981	2.94e-20	2.9e-16	gnl|BL_ORD_ID|61971 sp|Q5SPB6|CHAC1_DANRE Glutathione-specific gamma-glutamylcyclotransferase 1 OS=Danio rerio OX=7955 GN=chac1 PE=3 SV=1//9.83725e-102
Opl0087790.1	60.2088	508.326	-3.0777	2.04e-06	0.0004078	gnl|BL_ORD_ID|64050 sp|Q3TQ03|CIART_MOUSE Circadian-associated transcriptional repressor OS=Mus musculus OX=10090 GN=Ciart PE=1 SV=1//6.05261e-33
Opl0152490.1	1.6484	12.9699	-2.976	0.00077296	0.040216	gnl|BL_ORD_ID|157883 sp|Q8K4Z6|GPC6A_MOUSE G-protein coupled receptor family C group 6 member A OS=Mus musculus OX=10090 GN=Gprc6a PE=1 SV=1//2.12593e-102
Opl0184170.1	108.476	724.134	-2.7389	3.48e-13	8.44e-10	gnl|BL_ORD_ID|153091 sp|Q8HZM5|GLNA_CANLF Glutamine synthetase OS=Canis lupus familiaris OX=9615 GN=GLUL PE=1 SV=3//0
Opl0142080.1	202.692	1319.72	-2.7029	0.00048321	0.028199	gnl|BL_ORD_ID|425124 sp|Q8WWT9|S13A3_HUMAN Solute carrier family 13 member 3 OS=Homo sapiens OX=9606 GN=SLC13A3 PE=1 SV=1//0
Opl0133230.1	148.035	918.247	-2.6329	4.97e-11	4.88e-08	gnl|BL_ORD_ID|64505 sp|Q8R0W1|CIPC_MOUSE CLOCK-interacting pacemaker OS=Mus musculus OX=10090 GN=Cipc PE=1 SV=4//8.81477e-08
Opl0090030.1	69.8337	432.24	-2.6298	5.15e-13	8.44e-10	gnl|BL_ORD_ID|64050 sp|Q3TQ03|CIART_MOUSE Circadian-associated transcriptional repressor OS=Mus musculus OX=10090 GN=Ciart PE=1 SV=1//2.22028e-30
Opl0107610.1	2.61501	16.1645	-2.6279	0.0006401	0.035066	gnl|BL_ORD_ID|113428 sp|P0DPD7|EFMT4_HUMAN EEF1A lysine methyltransferase 4 OS=Homo sapiens OX=9606 GN=EEF1AKMT4 PE=1 SV=1//1.36571e-77
Opl0082320.1	10.1758	62.4607	-2.6178	6.79e-09	3.26e-06	gnl|BL_ORD_ID|161768 sp|Q8C5Q4|GRSF1_MOUSE G-rich sequence factor 1 OS=Mus musculus OX=10090 GN=Grsf1 PE=1 SV=2//7.21347e-100
Opl0082020.1	144.201	864.226	-2.5833	1.22e-09	7.73e-07	-//-
Opl0002700.1	67.927	389.038	-2.5179	9.2e-16	3.62e-12	gnl|BL_ORD_ID|475352 sp|O75069|TMCC2_HUMAN Transmembrane and coiled-coil domains protein 2 OS=Homo sapiens OX=9606 GN=TMCC2 PE=1 SV=3//1.97184e-148
Opl0094720.1	164.052	921.505	-2.4898	5.24e-10	3.68e-07	gnl|BL_ORD_ID|77202 sp|Q6PBN4|CQ10X_DANRE Coenzyme Q-binding protein COQ10 homolog, mitochondrial OS=Danio rerio OX=7955 GN=zgc:73324 PE=2 SV=2//8.90565e-100
Opl0042920.1	78.4309	431.188	-2.4588	1.22e-10	1.09e-07	gnl|BL_ORD_ID|207196 sp|Q01713|KLF9_RAT Krueppel-like factor 9 OS=Rattus norvegicus OX=10116 GN=Klf9 PE=2 SV=1//2.2836e-57
Opl0049110.1	9.5161	51.4447	-2.4346	9.77e-05	0.0087319	gnl|BL_ORD_ID|80713 sp|O94985|CSTN1_HUMAN Calsyntenin-1 OS=Homo sapiens OX=9606 GN=CLSTN1 PE=1 SV=1//0
Opl0194270.1	6.8801	36.8232	-2.4201	4.32e-06	0.00076539	gnl|BL_ORD_ID|45389 sp|Q8QGQ7|BMAL2_CHICK Aryl hydrocarbon receptor nuclear translocator-like protein 2 OS=Gallus gallus OX=9031 GN=ARNTL2 PE=1 SV=1//2.14627e-125
Opl0206300.1	13.6602	72.961	-2.4172	1.28e-08	5.46e-06	gnl|BL_ORD_ID|129777 sp|Q8CAT8|FBX48_MOUSE F-box only protein 48 OS=Mus musculus OX=10090 GN=Fbxo48 PE=2 SV=1//2.19024e-21
Novel00852	3136.73	16698.8	-2.4124	1.41e-08	5.89e-06	hypothetical protein EH28_03396 [Larimichthys crocea]
Opl0062950.1	604.986	3056.57	-2.3369	9.16e-08	2.81e-05	-//-
Opl0090140.1	12.3446	61.3803	-2.3139	0.00071915	0.038226	gnl|BL_ORD_ID|207161 sp|Q9Y2Y9|KLF13_HUMAN Krueppel-like factor 13 OS=Homo sapiens OX=9606 GN=KLF13 PE=1 SV=1//7.34846e-77
Opl0030150.1	65.6681	325.992	-2.3116	4.26e-13	8.44e-10	gnl|BL_ORD_ID|65068 sp|Q6NWE0|CK054_DANRE Ester hydrolase C11orf54 homolog OS=Danio rerio OX=7955 GN=zgc:85789 PE=2 SV=1//1.48949e-179
Opl0140460.1	159.325	783.484	-2.2979	2.17e-10	1.86e-07	gnl|BL_ORD_ID|495214 sp|Q8IYT8|ULK2_HUMAN Serine/threonine-protein kinase ULK2 OS=Homo sapiens OX=9606 GN=ULK2 PE=1 SV=3//0
Opl0109010.1	34.2717	165.606	-2.2727	4.2e-11	4.59e-08	gnl|BL_ORD_ID|333466 sp|Q6PEI7|PYRG1_DANRE CTP synthase 1 OS=Danio rerio OX=7955 GN=ctps1 PE=1 SV=1//0
Opl0133170.1	7.52708	35.7299	-2.247	5.22e-05	0.0053741	gnl|BL_ORD_ID|88511 sp|Q96B18|DACT3_HUMAN Dapper homolog 3 OS=Homo sapiens OX=9606 GN=DACT3 PE=1 SV=2//3.73774e-08
Opl0125820.1	44.8115	211.122	-2.2361	1.74e-06	0.00035544	gnl|BL_ORD_ID|503694 sp|P50412|VEGFA_SHEEP Vascular endothelial growth factor A OS=Ovis aries OX=9940 GN=VEGFA PE=2 SV=1//2.61921e-29
Opl0079990.1	87.2437	381.237	-2.1276	5.47e-06	0.00091874	gnl|BL_ORD_ID|177552 sp|Q16534|HLF_HUMAN Hepatic leukemia factor OS=Homo sapiens OX=9606 GN=HLF PE=2 SV=1//1.74001e-08
Opl0160620.1	288.275	1227.99	-2.0908	4.84e-13	8.44e-10	gnl|BL_ORD_ID|99974 sp|Q5ZJH9|DKC1_CHICK H/ACA ribonucleoprotein complex subunit 4 OS=Gallus gallus OX=9031 GN=DKC1 PE=2 SV=1//0
Opl0195900.1	132.34	561.75	-2.0857	3.79e-12	4.97e-09	gnl|BL_ORD_ID|117372 sp|A0A0C5PHQ7|ELOV5_TACFU Elongation of very long chain fatty acids protein 5 OS=Tachysurus fulvidraco OX=1234273 GN=ELOVL5 PE=2 SV=1//7.88143e-161
Opl0036440.1	112.158	475.041	-2.0825	5.63e-12	6.93e-09	gnl|BL_ORD_ID|79042 sp|Q4KML2|CRYD_DANRE Cryptochrome DASH OS=Danio rerio OX=7955 GN=cry-dash PE=2 SV=2//0
Opl0122920.1	72.5675	306.719	-2.0795	4.94e-11	4.88e-08	gnl|BL_ORD_ID|469457 sp|A8C750|THADA_CANLF Thyroid adenoma-associated protein homolog OS=Canis lupus familiaris OX=9615 GN=THADA PE=2 SV=1//0
Opl0177980.1	68.2312	287.499	-2.0751	5.3e-06	0.00089825	gnl|BL_ORD_ID|509266 sp|Q9UNX4|WDR3_HUMAN WD repeat-containing protein 3 OS=Homo sapiens OX=9606 GN=WDR3 PE=1 SV=1//0
Opl0167500.1	13.6176	56.8441	-2.0615	9.52e-06	0.0014092	gnl|BL_ORD_ID|234492 sp|A5WVX1|MET13_DANRE Methyltransferase-like protein 13 OS=Danio rerio OX=7955 GN=mettl13 PE=2 SV=1//0
Opl0187100.1	1858.49	7649.59	-2.0413	3.15e-13	8.44e-10	gnl|BL_ORD_ID|4155 sp|O95342|ABCBB_HUMAN Bile salt export pump OS=Homo sapiens OX=9606 GN=ABCB11 PE=1 SV=2//6.3917e-105
Opl0132080.1	86.5887	353.49	-2.0294	2.29e-06	0.00043706	gnl|BL_ORD_ID|268267 sp|Q66J36|NFIL3_XENLA Nuclear factor interleukin-3-regulated protein OS=Xenopus laevis OX=8355 GN=nfil3 PE=2 SV=1//1.69136e-15
Opl0091120.1	29.2256	117.844	-2.0116	1.79e-06	0.00036223	gnl|BL_ORD_ID|213398 sp|Q588F8|LEP_TETNG Leptin OS=Tetraodon nigroviridis OX=99883 GN=lep PE=2 SV=2//2.13909e-47
Opl0057180.1	46.4749	185.776	-1.999	1.69e-09	1.04e-06	gnl|BL_ORD_ID|28652 sp|Q9D1A4|ASB5_MOUSE Ankyrin repeat and SOCS box protein 5 OS=Mus musculus OX=10090 GN=Asb5 PE=2 SV=1//2.19311e-95
Opl0123420.1	73.5404	293.36	-1.9961	1.81e-08	7.26e-06	gnl|BL_ORD_ID|227992 sp|Q8BMF3|MAON_MOUSE NADP-dependent malic enzyme, mitochondrial OS=Mus musculus OX=10090 GN=Me3 PE=1 SV=2//0
Opl0117980.1	14.9138	59.1988	-1.9889	4.08e-06	0.00072874	gnl|BL_ORD_ID|440319 sp|Q3UMC0|SPAT5_MOUSE Spermatogenesis-associated protein 5 OS=Mus musculus OX=10090 GN=Spata5 PE=1 SV=2//1.04839e-42
Opl0096290.1	50.6924	199.302	-1.9751	0.00059996	0.033521	gnl|BL_ORD_ID|385685 sp|Q9DB15|RM12_MOUSE 39S ribosomal protein L12, mitochondrial OS=Mus musculus OX=10090 GN=Mrpl12 PE=1 SV=2//1.0481e-54
Opl0027530.1	524.811	2060.89	-1.9734	0.00067075	0.03634	gnl|BL_ORD_ID|421992 sp|Q64548|RTN1_RAT Reticulon-1 OS=Rattus norvegicus OX=10116 GN=Rtn1 PE=1 SV=1//4.30227e-74
Opl0187480.1	11.7618	46.0752	-1.9699	3.19e-05	0.0035634	gnl|BL_ORD_ID|188469 sp|Q24UI6|IF2_DESHY Translation initiation factor IF-2 OS=Desulfitobacterium hafniense (strain Y51) OX=138119 GN=infB PE=3 SV=1//3.50092e-07
Opl0125650.1	43.7239	168.331	-1.9448	8.35e-09	3.65e-06	gnl|BL_ORD_ID|194137 sp|A7YD35|IOD3_SPAAU Thyroxine 5-deiodinase OS=Sparus aurata OX=8175 GN=dio3 PE=2 SV=2//2.5416e-131
Opl0178540.1	45.6967	175.314	-1.9398	7.33e-09	3.37e-06	gnl|BL_ORD_ID|485515 sp|Q8WWH5|TRUB1_HUMAN Probable tRNA pseudouridine synthase 1 OS=Homo sapiens OX=9606 GN=TRUB1 PE=1 SV=1//4.01549e-112
Opl0048440.1	833.935	3189.73	-1.9354	4.36e-05	0.0046329	gnl|BL_ORD_ID|121904 sp|Q9UJM3|ERRFI_HUMAN ERBB receptor feedback inhibitor 1 OS=Homo sapiens OX=9606 GN=ERRFI1 PE=1 SV=1//1.5137e-16
Opl0206230.1	26.2261	100.085	-1.9322	3.93e-07	9.79e-05	gnl|BL_ORD_ID|267138 sp|A3KP37|NDUF5_DANRE Arginine-hydroxylase NDUFAF5, mitochondrial OS=Danio rerio OX=7955 GN=ndufaf5 PE=2 SV=1//0
Opl0175730.1	16.6843	63.424	-1.9265	0.00016152	0.012757	gnl|BL_ORD_ID|16965 sp|Q5R698|ANM5_PONAB Protein arginine N-methyltransferase 5 OS=Pongo abelii OX=9601 GN=PRMT5 PE=2 SV=3//0
Opl0079900.1	76.8195	286.659	-1.8998	7.43e-07	0.00017597	gnl|BL_ORD_ID|161782 sp|Q9BQ67|GRWD1_HUMAN Glutamate-rich WD repeat-containing protein 1 OS=Homo sapiens OX=9606 GN=GRWD1 PE=1 SV=1//0
Opl0113770.1	14.9773	55.6245	-1.8929	1.8e-05	0.0022893	gnl|BL_ORD_ID|427051 sp|Q7PCJ8|SAT2_BOVIN Diamine acetyltransferase 2 OS=Bos taurus OX=9913 GN=SAT2 PE=2 SV=1//1.29935e-55
Opl0083460.1	100.654	373.271	-1.8908	5.07e-06	0.00086682	gnl|BL_ORD_ID|3271 sp|A3QK15|AACS_DANRE Acetoacetyl-CoA synthetase OS=Danio rerio OX=7955 GN=aacs PE=2 SV=1//0
Opl0181320.1	124.207	460.327	-1.8899	3.5e-10	2.55e-07	gnl|BL_ORD_ID|229657 sp|Q6DRL5|MBB1A_DANRE Myb-binding protein 1A-like protein OS=Danio rerio OX=7955 GN=mybbp1a PE=1 SV=1//1.32589e-111
Opl0134260.1	10.7344	39.6213	-1.884	0.00014604	0.011771	gnl|BL_ORD_ID|506393 sp|Q6NYY9|VMP1_DANRE Vacuole membrane protein 1 OS=Danio rerio OX=7955 GN=vmp1 PE=2 SV=1//0
Opl0071040.1	8.44229	31.065	-1.8796	0.00041565	0.025466	gnl|BL_ORD_ID|288278 sp|P00480|OTC_HUMAN Ornithine carbamoyltransferase, mitochondrial OS=Homo sapiens OX=9606 GN=OTC PE=1 SV=3//0
Opl0041490.1	64.9628	238.909	-1.8788	1.83e-05	0.0022893	gnl|BL_ORD_ID|495212 sp|O75385|ULK1_HUMAN Serine/threonine-protein kinase ULK1 OS=Homo sapiens OX=9606 GN=ULK1 PE=1 SV=2//1.57832e-97
Opl0218620.1	95.5548	348.37	-1.8662	1.74e-09	1.04e-06	gnl|BL_ORD_ID|352568 sp|Q9BRS2|RIOK1_HUMAN Serine/threonine-protein kinase RIO1 OS=Homo sapiens OX=9606 GN=RIOK1 PE=1 SV=2//0
Opl0129150.1	11.9736	43.2937	-1.8543	0.0001031	0.0089235	gnl|BL_ORD_ID|492007 sp|P25979|UBF1A_XENLA Nucleolar transcription factor 1-A OS=Xenopus laevis OX=8355 GN=ubtf-a PE=2 SV=1//2.08005e-15
Opl0054990.1	53.861	193.889	-1.8479	3.1e-08	1.09e-05	gnl|BL_ORD_ID|285323 sp|O60502|OGA_HUMAN Protein O-GlcNAcase OS=Homo sapiens OX=9606 GN=MGEA5 PE=1 SV=2//3.7252e-77
Opl0105840.1	89.2189	320.323	-1.8441	6.92e-05	0.0067366	gnl|BL_ORD_ID|172557 sp|Q9JLR9|HIG1A_MOUSE HIG1 domain family member 1A, mitochondrial OS=Mus musculus OX=10090 GN=Higd1a PE=1 SV=1//5.32284e-37
Opl0030510.1	343.935	1232.08	-1.8409	1.18e-06	0.00026085	gnl|BL_ORD_ID|272959 sp|P16039|NPM_CHICK Nucleophosmin OS=Gallus gallus OX=9031 GN=NPM1 PE=2 SV=1//2.30305e-66
Opl0052760.1	720.111	2566.09	-1.8333	6.7e-09	3.26e-06	gnl|BL_ORD_ID|349030 sp|Q69D48|RHBGA_XENLA Ammonium transporter Rh type B-A OS=Xenopus laevis OX=8355 GN=rhbg-a PE=2 SV=1//5.97364e-128
Opl0053410.1	111.655	397.864	-1.8332	1.82e-09	1.04e-06	gnl|BL_ORD_ID|192838 sp|P52292|IMA1_HUMAN Importin subunit alpha-1 OS=Homo sapiens OX=9606 GN=KPNA2 PE=1 SV=1//0
Opl0113600.1	259.488	923.887	-1.8321	3.04e-10	2.39e-07	gnl|BL_ORD_ID|299299 sp|O15534|PER1_HUMAN Period circadian protein homolog 1 OS=Homo sapiens OX=9606 GN=PER1 PE=1 SV=2//4.29106e-33
Opl0204640.1	88.8951	316.449	-1.8318	5.83e-08	1.88e-05	gnl|BL_ORD_ID|317985 sp|Q6AYG3|PRUN1_RAT Exopolyphosphatase PRUNE1 OS=Rattus norvegicus OX=10116 GN=Prune1 PE=1 SV=1//8.60731e-22
Opl0089200.1	162.522	575.916	-1.8252	1.21e-07	3.61e-05	gnl|BL_ORD_ID|143085 sp|O43903|GAS2_HUMAN Growth arrest-specific protein 2 OS=Homo sapiens OX=9606 GN=GAS2 PE=1 SV=1//8.12135e-156
Opl0201480.1	973.811	3416.22	-1.8107	0.00021668	0.015764	gnl|BL_ORD_ID|311511 sp|Q9CW07|PP13G_MOUSE Protein phosphatase 1 regulatory subunit 3G OS=Mus musculus OX=10090 GN=Ppp1r3g PE=1 SV=2//2.32843e-40
Opl0100460.1	18.8885	66.0189	-1.8054	9.99e-06	0.0014665	gnl|BL_ORD_ID|472487 sp|O15164|TIF1A_HUMAN Transcription intermediary factor 1-alpha OS=Homo sapiens OX=9606 GN=TRIM24 PE=1 SV=3//3.90482e-22
Opl0118280.1	77.7085	271.276	-1.8036	5.45e-05	0.0055823	gnl|BL_ORD_ID|312704 sp|P26882|PPID_BOVIN Peptidyl-prolyl cis-trans isomerase D OS=Bos taurus OX=9913 GN=PPID PE=1 SV=6//0
Opl0116960.1	33.1227	115.516	-1.8022	0.00031511	0.020866	gnl|BL_ORD_ID|308947 sp|Q6P3H4|PNCB_DANRE Nicotinate phosphoribosyltransferase OS=Danio rerio OX=7955 GN=naprt PE=2 SV=2//0
Opl0030130.1	38.6818	134.879	-1.8019	1.9e-07	5.51e-05	gnl|BL_ORD_ID|9422 sp|A8KB34|ACY2_DANRE Aspartoacylase OS=Danio rerio OX=7955 GN=aspa PE=2 SV=1//0
Opl0110990.1	22.4259	77.5576	-1.7901	7.49e-06	0.0011689	gnl|BL_ORD_ID|509403 sp|Q58D06|WDR74_BOVIN WD repeat-containing protein 74 OS=Bos taurus OX=9913 GN=WDR74 PE=2 SV=1//8.83197e-135
Opl0023160.1	31.9537	109.624	-1.7785	2.15e-05	0.0025898	gnl|BL_ORD_ID|443600 sp|Q9JJG5|SRTD2_MOUSE SERTA domain-containing protein 2 OS=Mus musculus OX=10090 GN=Sertad2 PE=1 SV=2//6.39859e-09
Opl0186530.1	181.109	616.888	-1.7681	2.59e-05	0.003016	gnl|BL_ORD_ID|145419 sp|O93343|GBP_XENLA GSK-3-binding protein OS=Xenopus laevis OX=8355 GN=gbp PE=1 SV=1//4.61528e-20
Opl0224210.1	1329.73	4507.07	-1.7611	0.0001137	0.0095972	gnl|BL_ORD_ID|271991 sp|O00567|NOP56_HUMAN Nucleolar protein 56 OS=Homo sapiens OX=9606 GN=NOP56 PE=1 SV=4//0
Opl0032880.1	1302.85	4411.27	-1.7595	3.42e-10	2.55e-07	gnl|BL_ORD_ID|425870 sp|A1L1P9|S47A1_DANRE Multidrug and toxin extrusion protein 1 OS=Danio rerio OX=7955 GN=slc47a1 PE=2 SV=1//3.43477e-144
Opl0210690.1	111.689	375.027	-1.7475	0.00034609	0.022243	gnl|BL_ORD_ID|509257 sp|Q8NI36|WDR36_HUMAN WD repeat-containing protein 36 OS=Homo sapiens OX=9606 GN=WDR36 PE=1 SV=1//0
Opl0214250.1	64.2014	215.323	-1.7458	5.73e-08	1.88e-05	gnl|BL_ORD_ID|330803 sp|Q91437|PYR1_SQUAC CAD protein OS=Squalus acanthias OX=7797 GN=CAD PE=2 SV=1//0
Opl0044240.1	15.0199	50.1936	-1.7406	8.52e-05	0.0080554	gnl|BL_ORD_ID|144899 sp|B5DFW7|GATC_SALSA Glutamyl-tRNA(Gln) amidotransferase subunit C, mitochondrial OS=Salmo salar OX=8030 GN=gatc PE=2 SV=1//4.43204e-78
Opl0004980.1	52.3168	174.01	-1.7338	8.18e-06	0.001247	gnl|BL_ORD_ID|457173 sp|Q6PF21|SYMC_XENLA Methionine--tRNA ligase, cytoplasmic OS=Xenopus laevis OX=8355 GN=mars PE=2 SV=1//0
Opl0172190.1	75.8308	250.445	-1.7236	6.97e-08	2.21e-05	gnl|BL_ORD_ID|239122 sp|Q9BUR5|MIC26_HUMAN MICOS complex subunit MIC26 OS=Homo sapiens OX=9606 GN=APOO PE=1 SV=1//5.89207e-57
Opl0115260.1	101.214	333.81	-1.7216	1.94e-08	7.65e-06	gnl|BL_ORD_ID|271862 sp|Q6DRH5|NOP10_DANRE H/ACA ribonucleoprotein complex subunit 3 OS=Danio rerio OX=7955 GN=nop10 PE=3 SV=1//6.64837e-36
Opl0042160.1	241.833	793.79	-1.7147	1.85e-09	1.04e-06	gnl|BL_ORD_ID|555027 sp|O76080|ZFAN5_HUMAN AN1-type zinc finger protein 5 OS=Homo sapiens OX=9606 GN=ZFAND5 PE=1 SV=1//9.40903e-93
Opl0223710.1	30.3108	97.6661	-1.688	4.65e-06	0.00080984	gnl|BL_ORD_ID|207138 sp|Q921I2|KLDC4_MOUSE Kelch domain-containing protein 4 OS=Mus musculus OX=10090 GN=Klhdc4 PE=2 SV=2//0
Opl0166170.1	28.6474	92.2386	-1.687	6.27e-06	0.0010197	gnl|BL_ORD_ID|278901 sp|P20397|NUCL_XENLA Nucleolin OS=Xenopus laevis OX=8355 GN=ncl PE=2 SV=3//3.61045e-73
Opl0195400.1	77.4848	249.314	-1.686	8.16e-08	2.55e-05	gnl|BL_ORD_ID|399720 sp|Q5ZKD5|RRP12_CHICK RRP12-like protein OS=Gallus gallus OX=9031 GN=RRP12 PE=2 SV=1//0
Opl0177030.1	188.948	605.088	-1.6792	6.45e-09	3.25e-06	gnl|BL_ORD_ID|425371 sp|Q6DG32|S2536_DANRE Solute carrier family 25 member 36-A OS=Danio rerio OX=7955 GN=slc25a36a PE=2 SV=1//0
Opl0029790.1	161.778	513.245	-1.6656	2.12e-08	7.85e-06	gnl|BL_ORD_ID|48053 sp|Q3T0B6|C1QBP_BOVIN Complement component 1 Q subcomponent-binding protein, mitochondrial OS=Bos taurus OX=9913 GN=C1QBP PE=2 SV=1//4.2062e-109
Opl0055000.1	33.0241	104.402	-1.6606	0.00061135	0.033869	gnl|BL_ORD_ID|313641 sp|Q5VV67|PPRC1_HUMAN Peroxisome proliferator-activated receptor gamma coactivator-related protein 1 OS=Homo sapiens OX=9606 GN=PPRC1 PE=1 SV=1//5.73124e-45
Opl0090990.1	19.0118	60.0856	-1.6601	0.00020551	0.015195	gnl|BL_ORD_ID|304035 sp|A9CJC9|PHRA_AGRFC Deoxyribodipyrimidine photo-lyase OS=Agrobacterium fabrum (strain C58 / ATCC 33970) OX=176299 GN=phrA PE=1 SV=1//3.04377e-87
Opl0200760.1	27.3805	85.8698	-1.649	1.3e-05	0.0017967	gnl|BL_ORD_ID|119989 sp|Q9NQZ7|ENTP7_HUMAN Ectonucleoside triphosphate diphosphohydrolase 7 OS=Homo sapiens OX=9606 GN=ENTPD7 PE=2 SV=1//0
Opl0193850.1	140.625	439.786	-1.645	2.31e-08	8.43e-06	gnl|BL_ORD_ID|177553 sp|Q8BW74|HLF_MOUSE Hepatic leukemia factor OS=Mus musculus OX=10090 GN=Hlf PE=2 SV=1//8.34782e-13
Opl0124450.1	174.787	546.143	-1.6437	2.09e-08	7.85e-06	gnl|BL_ORD_ID|129601 sp|P22232|FBRL_XENLA rRNA 2'-O-methyltransferase fibrillarin OS=Xenopus laevis OX=8355 GN=fbl PE=2 SV=1//1.30612e-161
Opl0083320.1	307.331	953.693	-1.6337	3.8e-05	0.0040889	gnl|BL_ORD_ID|4776 sp|Q7ZYC4|ACBG2_XENLA Long-chain-fatty-acid--CoA ligase ACSBG2 OS=Xenopus laevis OX=8355 GN=acsbg2 PE=2 SV=1//0
Opl0017590.1	12.0289	37.2149	-1.6294	0.00080498	0.04049	gnl|BL_ORD_ID|438090 sp|Q9H7B4|SMYD3_HUMAN Histone-lysine N-methyltransferase SMYD3 OS=Homo sapiens OX=9606 GN=SMYD3 PE=1 SV=4//5.6757e-117
Opl0009020.1	48.2721	148.697	-1.6231	2.32e-06	0.0004386	gnl|BL_ORD_ID|226279 sp|Q8AWD1|M1I1L_DANRE Mid1-interacting protein 1-like OS=Danio rerio OX=7955 GN=mid1ip1l PE=2 SV=1//8.04765e-78
Opl0081740.1	279.606	856.509	-1.6151	1.61e-05	0.00211	gnl|BL_ORD_ID|226847 sp|A2AJI0|MA7D1_MOUSE MAP7 domain-containing protein 1 OS=Mus musculus OX=10090 GN=Map7d1 PE=1 SV=1//6.1668e-32
Novel00802	146.463	445.698	-1.6055	0.0010086	0.047684	PREDICTED: retinol-binding protein 2 [Cynoglossus semilaevis]
Opl0053440.1	129.356	392.654	-1.6019	1.01e-07	3.04e-05	gnl|BL_ORD_ID|271764 sp|Q4V9P9|NOL11_DANRE Nucleolar protein 11-like OS=Danio rerio OX=7955 GN=nol11 PE=2 SV=1//0
Opl0109000.1	195.687	592.923	-1.5993	6.81e-06	0.0010838	gnl|BL_ORD_ID|64851 sp|Q9I8K7|CITE3_CHICK Cbp/p300-interacting transactivator 3 OS=Gallus gallus OX=9031 GN=CITED3 PE=2 SV=1//7.23115e-57
Opl0122380.1	676.543	2032.48	-1.587	7.36e-09	3.37e-06	gnl|BL_ORD_ID|346002 sp|P07949|RET_HUMAN Proto-oncogene tyrosine-protein kinase receptor Ret OS=Homo sapiens OX=9606 GN=RET PE=1 SV=3//0
Novel00149	443.112	1328.31	-1.5839	1.63e-08	6.68e-06	PREDICTED: glutamate dehydrogenase, mitochondrial-like [Larimichthys crocea]
Opl0013270.1	554.929	1656.93	-1.5781	2.45e-08	8.76e-06	gnl|BL_ORD_ID|2006 sp|Q98TT6|4EB3L_DANRE Eukaryotic translation initiation factor 4E-binding protein 3-like OS=Danio rerio OX=7955 GN=eif4ebp3l PE=1 SV=1//3.65455e-55
Opl0222670.1	17.9014	53.2881	-1.5737	0.00024704	0.01729	gnl|BL_ORD_ID|463641 sp|F1R3W0|TAF1B_DANRE TATA box-binding protein-associated factor RNA polymerase I subunit B OS=Danio rerio OX=7955 GN=taf1b PE=2 SV=1//4.79489e-155
Opl0170780.1	37.8644	112.47	-1.5706	1.15e-05	0.0016267	gnl|BL_ORD_ID|487954 sp|Q5F3K0|TTC27_CHICK Tetratricopeptide repeat protein 27 OS=Gallus gallus OX=9031 GN=TTC27 PE=2 SV=1//0
Opl0203740.1	83.1712	246.087	-1.565	5.92e-07	0.00014552	gnl|BL_ORD_ID|269497 sp|Q6PBV6|NHP2_DANRE H/ACA ribonucleoprotein complex subunit 2-like protein OS=Danio rerio OX=7955 GN=nhp2 PE=2 SV=1//5.19786e-29
Opl0209710.1	28.2952	83.7153	-1.5649	0.00038275	0.023746	gnl|BL_ORD_ID|278883 sp|Q14249|NUCG_HUMAN Endonuclease G, mitochondrial OS=Homo sapiens OX=9606 GN=ENDOG PE=1 SV=4//1.27141e-137
Opl0197490.1	47.4227	140.286	-1.5647	6.19e-06	0.0010138	gnl|BL_ORD_ID|265939 sp|Q9WV85|NDK3_MOUSE Nucleoside diphosphate kinase 3 OS=Mus musculus OX=10090 GN=Nme3 PE=1 SV=3//9.04056e-81
Opl0044320.1	67.4242	199.133	-1.5624	1.17e-06	0.00026085	gnl|BL_ORD_ID|499965 sp|O75691|UTP20_HUMAN Small subunit processome component 20 homolog OS=Homo sapiens OX=9606 GN=UTP20 PE=1 SV=3//2.62204e-42
Opl0019120.1	38.8564	114.076	-1.5538	2.96e-05	0.0034073	gnl|BL_ORD_ID|92191 sp|P28918|DCAM_MESAU S-adenosylmethionine decarboxylase proenzyme OS=Mesocricetus auratus OX=10036 GN=AMD1 PE=2 SV=1//2.62663e-158
Opl0201090.1	3347.2	9819.27	-1.5527	2.01e-08	7.76e-06	gnl|BL_ORD_ID|54411 sp|Q58H57|CBS_MACFA Cystathionine beta-synthase OS=Macaca fascicularis OX=9541 GN=CBS PE=2 SV=3//0
Opl0002730.1	113.688	332.945	-1.5502	2.36e-07	6.54e-05	gnl|BL_ORD_ID|47772 sp|Q13895|BYST_HUMAN Bystin OS=Homo sapiens OX=9606 GN=BYSL PE=1 SV=3//0
Opl0043260.1	27.7427	81.0421	-1.5466	6.14e-05	0.0061908	gnl|BL_ORD_ID|271796 sp|Q6NRY2|NOL6_XENLA Nucleolar protein 6 OS=Xenopus laevis OX=8355 GN=nol6 PE=2 SV=2//0
Opl0220310.1	68.0497	198.441	-1.5441	1.38e-06	0.00029426	gnl|BL_ORD_ID|330496 sp|Q15269|PWP2_HUMAN Periodic tryptophan protein 2 homolog OS=Homo sapiens OX=9606 GN=PWP2 PE=2 SV=2//0
Opl0177480.1	49.0932	142.966	-1.5421	3e-05	0.0034357	gnl|BL_ORD_ID|99644 sp|Q6GNV7|DIRC2_XENLA Disrupted in renal carcinoma protein 2 homolog OS=Xenopus laevis OX=8355 GN=dirc2 PE=2 SV=1//0
Opl0073890.1	1070.07	3112.63	-1.5404	3.43e-08	1.17e-05	gnl|BL_ORD_ID|278901 sp|P20397|NUCL_XENLA Nucleolin OS=Xenopus laevis OX=8355 GN=ncl PE=2 SV=3//9.03192e-137
Opl0086690.1	48.6825	141.4	-1.5383	0.00010345	0.0089235	gnl|BL_ORD_ID|259614 sp|Q6TEM9|MYLIA_DANRE E3 ubiquitin-protein ligase MYLIP-A OS=Danio rerio OX=7955 GN=mylipa PE=1 SV=2//0
Opl0177340.1	77.4575	222.963	-1.5253	1.57e-06	0.00032453	gnl|BL_ORD_ID|74189 sp|A3QJU3|COQ8B_DANRE Atypical kinase COQ8B, mitochondrial OS=Danio rerio OX=7955 GN=coq8b PE=3 SV=2//0
Opl0195340.1	18.9294	54.0156	-1.5127	0.00043444	0.026209	gnl|BL_ORD_ID|271373 sp|O42584|NO29_XENLA Nucleoplasmin-like protein NO29 OS=Xenopus laevis OX=8355 PE=2 SV=1//4.62667e-24
Opl0172750.1	213.871	609.51	-1.5109	2.67e-07	7.11e-05	gnl|BL_ORD_ID|239330 sp|Q5XJS0|MIGA1_DANRE Mitoguardin 1 OS=Danio rerio OX=7955 GN=miga1 PE=2 SV=1//0
Opl0177470.1	16.66	47.3872	-1.5081	0.00065018	0.035422	gnl|BL_ORD_ID|167207 sp|Q6AXL5|HBAP1_DANRE HSPB1-associated protein 1 homolog OS=Danio rerio OX=7955 GN=hspbap1 PE=2 SV=2//1.20945e-143
Opl0081440.1	64.0098	181.504	-1.5036	3.4e-06	0.00062463	gnl|BL_ORD_ID|333466 sp|Q6PEI7|PYRG1_DANRE CTP synthase 1 OS=Danio rerio OX=7955 GN=ctps1 PE=1 SV=1//0
Opl0202010.1	25.4937	72.1932	-1.5017	0.0001314	0.010768	gnl|BL_ORD_ID|108188 sp|Q9NX74|DUS2L_HUMAN tRNA-dihydrouridine(20) synthase [NAD(P)+]-like OS=Homo sapiens OX=9606 GN=DUS2 PE=1 SV=1//0
Opl0016370.1	75.6414	214.017	-1.5005	2.22e-06	0.00042857	gnl|BL_ORD_ID|169004 sp|Q8BQM4|HEAT3_MOUSE HEAT repeat-containing protein 3 OS=Mus musculus OX=10090 GN=Heatr3 PE=1 SV=1//0
Opl0012360.1	106.396	299.162	-1.4915	1.16e-06	0.00026085	gnl|BL_ORD_ID|275671 sp|Q9R1J0|NSDHL_MOUSE Sterol-4-alpha-carboxylate 3-dehydrogenase, decarboxylating OS=Mus musculus OX=10090 GN=Nsdhl PE=1 SV=1//1.69203e-160
Opl0019110.1	117.818	329.307	-1.4829	2.18e-06	0.00042469	gnl|BL_ORD_ID|391909 sp|Q2YDN6|RPF2_BOVIN Ribosome production factor 2 homolog OS=Bos taurus OX=9913 GN=RPF2 PE=2 SV=1//9.55137e-165
Opl0212580.1	61.7729	172.535	-1.4818	8.02e-06	0.0012365	gnl|BL_ORD_ID|421598 sp|P82928|RT28_BOVIN 28S ribosomal protein S28, mitochondrial OS=Bos taurus OX=9913 GN=MRPS28 PE=1 SV=2//8.57572e-49
Opl0046380.1	269.078	750.852	-1.4805	2.34e-07	6.54e-05	gnl|BL_ORD_ID|462544 sp|A7Z033|T11L2_BOVIN T-complex protein 11-like protein 2 OS=Bos taurus OX=9913 GN=TCP11L2 PE=2 SV=1//3.97799e-162
Opl0108640.1	222.444	618.829	-1.4761	0.00017345	0.013394	gnl|BL_ORD_ID|23261 sp|P61214|ARL4A_RAT ADP-ribosylation factor-like protein 4A OS=Rattus norvegicus OX=10116 GN=Arl4a PE=2 SV=1//1.73912e-113
Opl0024620.1	35.6275	98.3373	-1.4647	0.00077097	0.040216	gnl|BL_ORD_ID|288793 sp|P31228|OXDD_BOVIN D-aspartate oxidase OS=Bos taurus OX=9913 GN=DDO PE=1 SV=2//4.28885e-130
Opl0117610.1	933.191	2574.11	-1.4638	0.00076118	0.039814	gnl|BL_ORD_ID|425452 sp|Q6DHS9|S2548_DANRE Solute carrier family 25 member 48 OS=Danio rerio OX=7955 GN=slc25a48 PE=2 SV=1//0
Opl0170220.1	23.1503	63.684	-1.4599	0.00026903	0.018371	gnl|BL_ORD_ID|19751 sp|P36972|APT_RAT Adenine phosphoribosyltransferase OS=Rattus norvegicus OX=10116 GN=Aprt PE=1 SV=1//8.90622e-71
Opl0140600.1	67.6298	185.106	-1.4526	1.57e-05	0.0020697	gnl|BL_ORD_ID|473816 sp|Q66L32|TIM8A_XENLA Mitochondrial import inner membrane translocase subunit Tim8 A OS=Xenopus laevis OX=8355 GN=timm8a PE=3 SV=1//7.17345e-42
Opl0004550.1	123.419	335.96	-1.4447	0.00010165	0.0088561	gnl|BL_ORD_ID|248244 sp|Q9UKD2|MRT4_HUMAN mRNA turnover protein 4 homolog OS=Homo sapiens OX=9606 GN=MRTO4 PE=1 SV=2//2.03585e-127
Opl0143530.1	1056.15	2871.43	-1.443	6.86e-06	0.0010838	gnl|BL_ORD_ID|306848 sp|P0C548|PLPL2_RAT Patatin-like phospholipase domain-containing protein 2 OS=Rattus norvegicus OX=10116 GN=Pnpla2 PE=1 SV=1//3.98397e-146
Opl0214930.1	133.719	362.61	-1.4392	2.05e-06	0.0004078	gnl|BL_ORD_ID|94766 sp|Q96GQ7|DDX27_HUMAN Probable ATP-dependent RNA helicase DDX27 OS=Homo sapiens OX=9606 GN=DDX27 PE=1 SV=2//0
Opl0167870.1	63.7034	172.712	-1.4389	5.07e-05	0.0052913	gnl|BL_ORD_ID|326508 sp|P28173|PUR1_CHICK Amidophosphoribosyltransferase OS=Gallus gallus OX=9031 GN=PPAT PE=2 SV=1//0
Opl0038210.1	66.4847	179.893	-1.436	9.53e-06	0.0014092	gnl|BL_ORD_ID|194781 sp|Q8TEX9|IPO4_HUMAN Importin-4 OS=Homo sapiens OX=9606 GN=IPO4 PE=1 SV=2//0
Opl0094730.1	21.2038	57.2452	-1.4328	0.0004513	0.026734	gnl|BL_ORD_ID|48065 sp|Q7Z5L3|C1QL2_HUMAN Complement C1q-like protein 2 OS=Homo sapiens OX=9606 GN=C1QL2 PE=2 SV=2//1.6226e-15
Opl0194180.1	3274.14	8796.07	-1.4257	1.91e-07	5.51e-05	gnl|BL_ORD_ID|425709 sp|Q5RE87|S38A4_PONAB Sodium-coupled neutral amino acid transporter 4 OS=Pongo abelii OX=9601 GN=SLC38A4 PE=2 SV=1//0
Opl0192380.1	74.6634	200.266	-1.4234	0.00010735	0.0091791	gnl|BL_ORD_ID|16950 sp|O60678|ANM3_HUMAN Protein arginine N-methyltransferase 3 OS=Homo sapiens OX=9606 GN=PRMT3 PE=1 SV=4//0
Novel00056	11838	31600.6	-1.4165	2.55e-07	6.96e-05	Dihydropyrimidine dehydrogenase [NADP(+)] [Larimichthys crocea]
Opl0195320.1	25.2205	67.1505	-1.4128	0.00034178	0.022111	gnl|BL_ORD_ID|313642 sp|Q6NZN1|PPRC1_MOUSE Peroxisome proliferator-activated receptor gamma coactivator-related protein 1 OS=Mus musculus OX=10090 GN=Pprc1 PE=1 SV=1//1.49624e-18
Opl0083810.1	112.312	297.954	-1.4076	6.49e-05	0.0064165	gnl|BL_ORD_ID|425245 sp|Q28E01|S20A2_XENTR Sodium-dependent phosphate transporter 2 OS=Xenopus tropicalis OX=8364 GN=slc20a2 PE=2 SV=1//0
Opl0035320.1	29.8812	79.2411	-1.407	0.00023585	0.016745	gnl|BL_ORD_ID|8789 sp|Q9UKU0|ACSL6_HUMAN Long-chain-fatty-acid--CoA ligase 6 OS=Homo sapiens OX=9606 GN=ACSL6 PE=2 SV=4//4.31776e-111
Opl0121830.1	22.358	59.2259	-1.4054	0.00078335	0.040435	gnl|BL_ORD_ID|276431 sp|Q9BSD7|NTPCR_HUMAN Cancer-related nucleoside-triphosphatase OS=Homo sapiens OX=9606 GN=NTPCR PE=1 SV=1//1.96165e-82
Opl0054970.1	176.269	465.986	-1.4025	1.45e-06	0.00030684	gnl|BL_ORD_ID|205548 sp|B5XB27|KFA_SALSA Kynurenine formamidase OS=Salmo salar OX=8030 GN=afmid PE=2 SV=1//5.47268e-171
Opl0103600.1	49.8407	130.656	-1.3904	3.14e-05	0.0035283	gnl|BL_ORD_ID|59281 sp|Q6P2H3|CEP85_HUMAN Centrosomal protein of 85 kDa OS=Homo sapiens OX=9606 GN=CEP85 PE=1 SV=1//9.34368e-99
Novel00166	775.414	2029.71	-1.3882	7.02e-07	0.00016834	-//-
Novel00859	665.239	1739.11	-1.3864	5.01e-06	0.00086448	40S ribosomal protein S27, partial [Scophthalmus maximus]
Opl0063350.1	103.642	270.568	-1.3844	7.03e-05	0.0067726	gnl|BL_ORD_ID|432752 sp|A2BGU8|SEPT3_DANRE Neuronal-specific septin-3 OS=Danio rerio OX=7955 GN=sept3 PE=2 SV=1//0
Opl0059980.1	22.755	59.2943	-1.3817	0.00078707	0.040435	gnl|BL_ORD_ID|440177 sp|Q9BVQ7|SPA5L_HUMAN Spermatogenesis-associated protein 5-like protein 1 OS=Homo sapiens OX=9606 GN=SPATA5L1 PE=1 SV=2//0
Opl0218430.1	110.732	287.558	-1.3768	8.42e-06	0.0012738	gnl|BL_ORD_ID|45702 sp|A0JMQ0|BOP1_DANRE Ribosome biogenesis protein bop1 OS=Danio rerio OX=7955 GN=bop1 PE=2 SV=1//0
Opl0190030.1	65.2998	169.267	-1.3742	3.41e-05	0.0037641	gnl|BL_ORD_ID|427019 sp|Q8R197|SAST_MOUSE S-acyl fatty acid synthase thioesterase, medium chain OS=Mus musculus OX=10090 GN=Olah PE=2 SV=1//1.33069e-80
Opl0026870.1	32.5393	84.2475	-1.3725	0.00025356	0.017588	gnl|BL_ORD_ID|289083 sp|Q501L1|P20D2_XENTR Peptidase M20 domain-containing protein 2 OS=Xenopus tropicalis OX=8364 GN=pm20d2 PE=2 SV=1//5.19249e-158
Opl0119010.1	31.5887	81.6102	-1.3693	0.00032996	0.021631	gnl|BL_ORD_ID|121444 sp|P48450|ERG7_RAT Lanosterol synthase OS=Rattus norvegicus OX=10116 GN=Lss PE=1 SV=2//0
Opl0093340.1	306.721	790.592	-1.366	1.19e-06	0.00026085	gnl|BL_ORD_ID|425413 sp|Q7SXW0|S2539_DANRE Solute carrier family 25 member 39 OS=Danio rerio OX=7955 GN=slc25a39 PE=2 SV=1//0
Opl0218630.1	31.9	82.2099	-1.3658	0.00024036	0.016883	gnl|BL_ORD_ID|396425 sp|O75818|RPP40_HUMAN Ribonuclease P protein subunit p40 OS=Homo sapiens OX=9606 GN=RPP40 PE=1 SV=3//4.69685e-100
Opl0062550.1	140.134	359.067	-1.3574	6.42e-06	0.0010341	gnl|BL_ORD_ID|16064 sp|Q5XGB9|AMPL_XENTR Cytosol aminopeptidase OS=Xenopus tropicalis OX=8364 GN=lap3 PE=2 SV=1//0
Opl0018830.1	165.476	422.531	-1.3524	0.00010177	0.0088561	gnl|BL_ORD_ID|231942 sp|Q9NU22|MDN1_HUMAN Midasin OS=Homo sapiens OX=9606 GN=MDN1 PE=1 SV=2//0
Opl0055360.1	472.707	1206.93	-1.3523	0.00044143	0.026388	gnl|BL_ORD_ID|427541 sp|Q9D662|SC23B_MOUSE Protein transport protein Sec23B OS=Mus musculus OX=10090 GN=Sec23b PE=1 SV=1//1.66273e-37
Opl0076350.1	142.425	362.589	-1.3481	8.05e-06	0.0012365	gnl|BL_ORD_ID|220809 sp|Q28C74|LPPRC_XENTR Leucine-rich PPR motif-containing protein, mitochondrial OS=Xenopus tropicalis OX=8364 GN=lrpprc PE=2 SV=1//0
Opl0095290.1	2530.92	6438.75	-1.3471	8.92e-07	0.00020873	gnl|BL_ORD_ID|15151 sp|P70389|ALS_MOUSE Insulin-like growth factor-binding protein complex acid labile subunit OS=Mus musculus OX=10090 GN=Igfals PE=1 SV=1//0
Opl0126860.1	32.2567	82.0554	-1.347	0.00035446	0.022634	gnl|BL_ORD_ID|302529 sp|Q8CHP8|PGP_MOUSE Glycerol-3-phosphate phosphatase OS=Mus musculus OX=10090 GN=Pgp PE=1 SV=1//2.58512e-129
Opl0225310.1	34.5493	87.8286	-1.346	0.00027027	0.018392	gnl|BL_ORD_ID|487791 sp|Q3KRG3|TSR2_DANRE Pre-rRNA-processing protein TSR2 homolog OS=Danio rerio OX=7955 GN=tsr2 PE=2 SV=1//2.25418e-57
Opl0032940.1	53.1597	134.931	-1.3438	6.26e-05	0.0062483	gnl|BL_ORD_ID|270677 sp|Q9NVX2|NLE1_HUMAN Notchless protein homolog 1 OS=Homo sapiens OX=9606 GN=NLE1 PE=1 SV=4//0
Opl0119740.1	384.421	974.847	-1.3425	1.51e-06	0.00031545	gnl|BL_ORD_ID|110444 sp|Q9HCM4|E41L5_HUMAN Band 4.1-like protein 5 OS=Homo sapiens OX=9606 GN=EPB41L5 PE=1 SV=3//0
Opl0085110.1	87.4922	221.332	-1.339	1.36e-05	0.0018584	gnl|BL_ORD_ID|149459 sp|P16310|GHR_RAT Growth hormone receptor OS=Rattus norvegicus OX=10116 GN=Ghr PE=1 SV=1//2.04212e-104
Opl0198750.1	35.8367	90.5506	-1.3373	0.00030289	0.020193	gnl|BL_ORD_ID|124218 sp|Q9NQT5|EXOS3_HUMAN Exosome complex component RRP40 OS=Homo sapiens OX=9606 GN=EXOSC3 PE=1 SV=3//1.05553e-43
Opl0148570.1	273.989	691.44	-1.3355	0.00055968	0.031449	gnl|BL_ORD_ID|442971 sp|P36956|SRBP1_HUMAN Sterol regulatory element-binding protein 1 OS=Homo sapiens OX=9606 GN=SREBF1 PE=1 SV=2//1.36913e-09
Opl0167660.1	458.05	1153.85	-1.3329	2.41e-06	0.0004516	gnl|BL_ORD_ID|98621 sp|Q15392|DHC24_HUMAN Delta(24)-sterol reductase OS=Homo sapiens OX=9606 GN=DHCR24 PE=1 SV=2//0
Opl0061670.1	83.3778	209.544	-1.3295	9.48e-05	0.0086839	gnl|BL_ORD_ID|236683 sp|P55918|MFAP4_BOVIN Microfibril-associated glycoprotein 4 OS=Bos taurus OX=9913 GN=MFAP4 PE=1 SV=2//1.57437e-12
Opl0053650.1	44.0123	110.448	-1.3274	0.0002032	0.015114	gnl|BL_ORD_ID|488902 sp|Q8BTV1|TUSC3_MOUSE Tumor suppressor candidate 3 OS=Mus musculus OX=10090 GN=Tusc3 PE=1 SV=1//0
Opl0073320.1	74.2585	186.345	-1.3274	4.09e-05	0.0043726	gnl|BL_ORD_ID|81273 sp|Q08BB5|CTL2A_DANRE CTD small phosphatase-like protein 2-A OS=Danio rerio OX=7955 GN=ctdspl2a PE=2 SV=1//1.25607e-66
Opl0135440.1	26.9753	67.6661	-1.3268	0.00095885	0.046064	gnl|BL_ORD_ID|429354 sp|A5PL98|SDHB_DANRE Succinate dehydrogenase [ubiquinone] iron-sulfur subunit, mitochondrial OS=Danio rerio OX=7955 GN=sdhb PE=2 SV=1//2.1193e-178
Opl0200930.1	154.4	384.891	-1.3178	1.08e-05	0.0015683	gnl|BL_ORD_ID|3564 sp|Q3SZK1|AAMP_BOVIN Angio-associated migratory cell protein OS=Bos taurus OX=9913 GN=AAMP PE=2 SV=1//2.29776e-166
Opl0181960.1	84.708	210.86	-1.3157	0.00030893	0.020526	gnl|BL_ORD_ID|235309 sp|Q3THS6|METK2_MOUSE S-adenosylmethionine synthase isoform type-2 OS=Mus musculus OX=10090 GN=Mat2a PE=1 SV=2//0
Novel00170	91.5039	227.52	-1.3141	0.00010007	0.0088255	-//-
Opl0153470.1	151.803	377.379	-1.3138	8.82e-06	0.0013234	gnl|BL_ORD_ID|487788 sp|Q5XGY1|TSR1_XENLA Pre-rRNA-processing protein TSR1 homolog OS=Xenopus laevis OX=8355 GN=tsr1 PE=2 SV=1//0
Opl0035460.1	123.504	306.931	-1.3134	0.00014464	0.011706	gnl|BL_ORD_ID|4203 sp|Q9UG63|ABCF2_HUMAN ATP-binding cassette sub-family F member 2 OS=Homo sapiens OX=9606 GN=ABCF2 PE=1 SV=2//0
Opl0074790.1	62.2572	153.715	-1.3039	9.69e-05	0.0087319	gnl|BL_ORD_ID|473655 sp|Q6DGJ3|TIM13_DANRE Mitochondrial import inner membrane translocase subunit Tim13 OS=Danio rerio OX=7955 GN=timm13 PE=3 SV=1//7.44516e-51
Opl0162060.1	137.855	340.229	-1.3034	1.45e-05	0.0019374	gnl|BL_ORD_ID|240311 sp|Q8JIY8|MK67I_DANRE MKI67 FHA domain-interacting nucleolar phosphoprotein OS=Danio rerio OX=7955 GN=nifk PE=2 SV=2//4.67508e-104
Opl0069920.1	192.814	473.766	-1.297	0.00062176	0.034157	gnl|BL_ORD_ID|85752 sp|Q1KKS2|CYCB_TAKRU Cytochrome c-b OS=Takifugu rubripes OX=31033 GN=cyc-B PE=3 SV=1//3.12888e-66
Opl0001790.1	98.6061	242.08	-1.2957	2.1e-05	0.0025767	gnl|BL_ORD_ID|211074 sp|Q8BWW4|LARP4_MOUSE La-related protein 4 OS=Mus musculus OX=10090 GN=Larp4 PE=1 SV=2//3.13548e-12
Opl0055250.1	140.028	341.94	-1.288	2.12e-05	0.0025898	gnl|BL_ORD_ID|399984 sp|Q14690|RRP5_HUMAN Protein RRP5 homolog OS=Homo sapiens OX=9606 GN=PDCD11 PE=1 SV=3//3.54738e-124
Novel00812	27.6869	67.5884	-1.2876	0.0010305	0.048368	PREDICTED: TPA-induced transmembrane protein [Notothenia coriiceps]
Opl0092460.1	48.4059	117.919	-1.2845	0.00026526	0.018241	gnl|BL_ORD_ID|385778 sp|Q6IQS9|RM23_DANRE 39S ribosomal protein L23, mitochondrial OS=Danio rerio OX=7955 GN=mrpl23 PE=2 SV=1//4.0444e-88
Opl0210130.1	90.0035	218.905	-1.2823	5.09e-05	0.0052913	gnl|BL_ORD_ID|271451 sp|Q6DRN3|NOC3L_DANRE Nucleolar complex protein 3 homolog OS=Danio rerio OX=7955 GN=noc3l PE=2 SV=1//1.32166e-23
Opl0172810.1	146.647	356.387	-1.2811	2.37e-05	0.002826	gnl|BL_ORD_ID|47078 sp|Q5M8V0|BT3L4_XENTR Transcription factor BTF3 homolog 4 OS=Xenopus tropicalis OX=8364 GN=btf3l4 PE=2 SV=1//4.09283e-76
Opl0121200.1	44.3292	107.547	-1.2786	0.00021265	0.015605	gnl|BL_ORD_ID|271817 sp|P41777|NOLC1_RAT Nucleolar and coiled-body phosphoprotein 1 OS=Rattus norvegicus OX=10116 GN=Nolc1 PE=1 SV=2//1.20212e-07
Opl0164730.1	150.018	362.746	-1.2738	2.4e-05	0.0028439	gnl|BL_ORD_ID|362730 sp|A4FV97|RL1D1_BOVIN Ribosomal L1 domain-containing protein 1 OS=Bos taurus OX=9913 GN=RSL1D1 PE=2 SV=1//3.82592e-83
Opl0023050.1	42.9402	103.779	-1.2731	0.00034486	0.022237	gnl|BL_ORD_ID|305445 sp|Q9CZX5|PINX1_MOUSE PIN2/TERF1-interacting telomerase inhibitor 1 OS=Mus musculus OX=10090 GN=Pinx1 PE=1 SV=2//4.88201e-78
Opl0177360.1	73.6482	177.791	-1.2715	0.00047016	0.027743	gnl|BL_ORD_ID|99037 sp|A6QP05|DHR12_BOVIN Dehydrogenase/reductase SDR family member 12 OS=Bos taurus OX=9913 GN=DHRS12 PE=2 SV=1//4.00348e-156
Opl0210930.1	38.3312	92.364	-1.2688	0.00060867	0.033815	gnl|BL_ORD_ID|509210 sp|Q68EI0|WDR18_DANRE WD repeat-containing protein 18 OS=Danio rerio OX=7955 GN=wdr18 PE=2 SV=1//0
Opl0195810.1	155.942	375.566	-1.2681	1.82e-05	0.0022893	gnl|BL_ORD_ID|426588 sp|Q96LT4|SAMD8_HUMAN Sphingomyelin synthase-related protein 1 OS=Homo sapiens OX=9606 GN=SAMD8 PE=1 SV=2//0
Opl0118490.1	131.112	315.492	-1.2668	3.02e-05	0.0034361	gnl|BL_ORD_ID|142993 sp|Q7ZVE0|GAR1_DANRE H/ACA ribonucleoprotein complex subunit 1 OS=Danio rerio OX=7955 GN=gar1 PE=2 SV=1//1.62041e-35
Opl0097600.1	72.2888	172.87	-1.2578	9.92e-05	0.0088118	gnl|BL_ORD_ID|326392 sp|X1WGX5|PUM3_DANRE Pumilio homolog 3 OS=Danio rerio OX=7955 GN=pum3 PE=2 SV=2//0
Opl0192580.1	1669.12	3976.96	-1.2526	6.08e-06	0.0010051	gnl|BL_ORD_ID|145924 sp|P22288|GCH1_RAT GTP cyclohydrolase 1 OS=Rattus norvegicus OX=10116 GN=Gch1 PE=1 SV=1//1.68741e-134
Opl0131520.1	364.011	865.644	-1.2498	1.04e-05	0.001517	gnl|BL_ORD_ID|94856 sp|P17844|DDX5_HUMAN Probable ATP-dependent RNA helicase DDX5 OS=Homo sapiens OX=9606 GN=DDX5 PE=1 SV=1//0
Opl0137130.1	61.7204	146.088	-1.243	0.00019269	0.014689	-//-
Opl0045010.1	416.016	984.178	-1.2423	2.56e-05	0.003002	gnl|BL_ORD_ID|189905 sp|Q5S1U6|IFRD1_PIG Interferon-related developmental regulator 1 OS=Sus scrofa OX=9823 GN=IFRD1 PE=2 SV=1//0
Opl0056170.1	76.5585	181.052	-1.2418	0.00012519	0.010433	gnl|BL_ORD_ID|473629 sp|Q6DI06|TIM10_DANRE Mitochondrial import inner membrane translocase subunit Tim10 OS=Danio rerio OX=7955 GN=timm10 PE=3 SV=1//1.45477e-56
Opl0138190.1	80.957	191.344	-1.2409	8.73e-05	0.008137	-//-
Opl0164720.1	229.624	542.273	-1.2397	2.2e-05	0.0026338	gnl|BL_ORD_ID|121271 sp|P15170|ERF3A_HUMAN Eukaryotic peptide chain release factor GTP-binding subunit ERF3A OS=Homo sapiens OX=9606 GN=GSPT1 PE=1 SV=1//0
Opl0052800.1	47.8898	113.087	-1.2396	0.0004228	0.025698	gnl|BL_ORD_ID|437776 sp|Q8WVI0|SMIM4_HUMAN Small integral membrane protein 4 OS=Homo sapiens OX=9606 GN=SMIM4 PE=1 SV=2//1.29433e-26
Opl0192790.1	283.075	666.153	-1.2347	1.37e-05	0.0018633	gnl|BL_ORD_ID|163685 sp|Q9JJZ1|GTR8_RAT Solute carrier family 2, facilitated glucose transporter member 8 OS=Rattus norvegicus OX=10116 GN=Slc2a8 PE=1 SV=1//7.0219e-176
Opl0171620.1	208.716	489.843	-1.2308	0.00079413	0.040435	gnl|BL_ORD_ID|60544 sp|Q9W6X3|CH10_ORYLA 10 kDa heat shock protein, mitochondrial OS=Oryzias latipes OX=8090 GN=hspe1 PE=3 SV=1//1.75067e-57
Opl0220990.1	175.89	412.214	-1.2287	0.00052212	0.029592	gnl|BL_ORD_ID|47057 sp|Q13410|BT1A1_HUMAN Butyrophilin subfamily 1 member A1 OS=Homo sapiens OX=9606 GN=BTN1A1 PE=1 SV=3//3.40013e-26
Opl0140450.1	38.7348	90.5384	-1.2249	0.00073208	0.038497	gnl|BL_ORD_ID|434292 sp|Q3MHW7|SGMR2_BOVIN Sigma intracellular receptor 2 OS=Bos taurus OX=9913 GN=TMEM97 PE=2 SV=1//5.6577e-40
Opl0161520.1	60.3695	140.603	-1.2197	0.00028433	0.019282	gnl|BL_ORD_ID|480197 sp|Q96FX7|TRM61_HUMAN tRNA (adenine(58)-N(1))-methyltransferase catalytic subunit TRMT61A OS=Homo sapiens OX=9606 GN=TRMT61A PE=1 SV=1//2.45045e-147
Opl0170230.1	107.065	249.336	-1.2196	9.73e-05	0.0087319	gnl|BL_ORD_ID|207006 sp|Q9N0C5|KITM_MACFA Thymidine kinase 2, mitochondrial OS=Macaca fascicularis OX=9541 GN=TK2 PE=2 SV=1//2.87362e-110
Opl0027760.1	67.2035	155.504	-1.2103	0.00019866	0.014992	gnl|BL_ORD_ID|94758 sp|Q5RDL2|DDX24_PONAB ATP-dependent RNA helicase DDX24 OS=Pongo abelii OX=9601 GN=DDX24 PE=2 SV=1//3.52733e-07
Opl0197400.1	259.021	598.88	-1.2092	0.00036683	0.023198	gnl|BL_ORD_ID|115386 sp|P49410|EFTU_BOVIN Elongation factor Tu, mitochondrial OS=Bos taurus OX=9913 GN=TUFM PE=1 SV=1//0
Opl0176590.1	99.8359	230.292	-1.2058	8.84e-05	0.0082034	gnl|BL_ORD_ID|493481 sp|O57429|UBP2_CHICK Ubiquitin carboxyl-terminal hydrolase 2 OS=Gallus gallus OX=9031 GN=USP2 PE=2 SV=1//0
Opl0154300.1	112.36	258.733	-1.2033	0.00010153	0.0088561	gnl|BL_ORD_ID|47484 sp|Q9CY21|BUD23_MOUSE Probable 18S rRNA (guanine-N(7))-methyltransferase OS=Mus musculus OX=10090 GN=Bud23 PE=1 SV=1//4.30449e-134
Opl0166410.1	1425.17	3279.83	-1.2025	1.31e-05	0.0017967	gnl|BL_ORD_ID|189333 sp|Q8JFP1|IF4A2_CHICK Eukaryotic initiation factor 4A-II OS=Gallus gallus OX=9031 GN=EIF4A2 PE=2 SV=1//0
Opl0226660.1	265.205	610.281	-1.2024	3.6e-05	0.0039146	gnl|BL_ORD_ID|189620 sp|Q6ZM19|IF6_DANRE Eukaryotic translation initiation factor 6 OS=Danio rerio OX=7955 GN=eif6 PE=2 SV=1//3.8862e-172
Opl0201150.1	97.0844	223.17	-1.2008	0.00079736	0.040435	gnl|BL_ORD_ID|326557 sp|P21872|PUR2_CHICK Trifunctional purine biosynthetic protein adenosine-3 OS=Gallus gallus OX=9031 GN=GART PE=2 SV=1//0
Opl0051240.1	44.7463	102.711	-1.1988	0.00079246	0.040435	gnl|BL_ORD_ID|13172 sp|Q9NWT8|AKIP_HUMAN Aurora kinase A-interacting protein OS=Homo sapiens OX=9606 GN=AURKAIP1 PE=1 SV=1//3.342e-39
Opl0129760.1	401.214	919.993	-1.1973	1.92e-05	0.0023884	gnl|BL_ORD_ID|157812 sp|P97564|GPAT1_RAT Glycerol-3-phosphate acyltransferase 1, mitochondrial OS=Rattus norvegicus OX=10116 GN=Gpam PE=1 SV=3//0
Novel00060	52.4099	119.873	-1.1936	0.00051073	0.029266	PREDICTED: DNA-directed RNA polymerases I and III subunit RPAC2-like isoform X1 [Oreochromis niloticus]>gi|499025067|ref|XP_004563286.1| PREDICTED: DNA-directed RNA polymerases I and III subunit RPAC2-like [Maylandia zebra]>gi|548333423|ref|XP_005719562.1| PREDICTED: DNA-directed RNA polymerases I and III subunit RPAC2-like isoform X1 [Pundamilia nyererei]>gi|583972897|ref|XP_006781855.1| PREDICT…
Opl0110340.1	49.644	113.019	-1.1869	0.00061923	0.034113	gnl|BL_ORD_ID|443588 sp|Q8BL97|SRSF7_MOUSE Serine/arginine-rich splicing factor 7 OS=Mus musculus OX=10090 GN=Srsf7 PE=1 SV=1//3.81523e-56
Opl0037010.1	78.7293	178.986	-1.1849	0.00019909	0.014992	gnl|BL_ORD_ID|400016 sp|Q9CYH6|RRS1_MOUSE Ribosome biogenesis regulatory protein homolog OS=Mus musculus OX=10090 GN=Rrs1 PE=1 SV=1//8.76584e-110
Opl0121890.1	87.8684	199.242	-1.1811	0.00023956	0.016883	gnl|BL_ORD_ID|385582 sp|Q5T653|RM02_HUMAN 39S ribosomal protein L2, mitochondrial OS=Homo sapiens OX=9606 GN=MRPL2 PE=1 SV=2//1.61919e-133
Opl0075540.1	102.748	232.122	-1.1758	0.00066543	0.036152	gnl|BL_ORD_ID|78413 sp|Q5U2V5|CRLS1_RAT Cardiolipin synthase (CMP-forming) OS=Rattus norvegicus OX=10116 GN=Crls1 PE=2 SV=1//3.07866e-97
Opl0038840.1	333.279	749.405	-1.169	0.00030105	0.020138	gnl|BL_ORD_ID|186929 sp|Q4R4W5|IDI1_MACFA Isopentenyl-diphosphate Delta-isomerase 1 OS=Macaca fascicularis OX=9541 GN=IDI1 PE=2 SV=2//1.85174e-117
Opl0146190.1	55.0288	123.45	-1.1657	0.00067446	0.036441	gnl|BL_ORD_ID|55399 sp|Q9H6F5|CCD86_HUMAN Coiled-coil domain-containing protein 86 OS=Homo sapiens OX=9606 GN=CCDC86 PE=1 SV=1//5.89426e-23
Opl0132120.1	167.062	372.661	-1.1575	6.62e-05	0.0065131	gnl|BL_ORD_ID|475206 sp|Q5XIY2|TM56B_DANRE Transmembrane protein 56-B OS=Danio rerio OX=7955 GN=tmem56b PE=2 SV=1//4.95504e-107
Novel00632	61.5229	136.987	-1.1548	0.00049146	0.028429	PREDICTED: CDGSH iron-sulfur domain-containing protein 3, mitochondrial [Larimichthys crocea]
Opl0044060.1	261.541	581.912	-1.1538	6.49e-05	0.0064165	gnl|BL_ORD_ID|299634 sp|B5X171|PESC_SALSA Pescadillo homolog OS=Salmo salar OX=8030 GN=pes1 PE=2 SV=1//0
Opl0018030.1	65.9433	146.64	-1.153	0.00048015	0.028105	gnl|BL_ORD_ID|448989 sp|A4IG62|SUV3_DANRE ATP-dependent RNA helicase SUPV3L1, mitochondrial OS=Danio rerio OX=7955 GN=supv3l1 PE=2 SV=1//0
Opl0097280.1	49.1131	109.094	-1.1514	0.0010705	0.049653	gnl|BL_ORD_ID|169792 sp|Q60HH9|HEM2_MACFA Delta-aminolevulinic acid dehydratase OS=Macaca fascicularis OX=9541 GN=ALAD PE=2 SV=2//0
Opl0187210.1	162.634	360.527	-1.1485	0.00012354	0.010339	gnl|BL_ORD_ID|248138 sp|O15439|MRP4_HUMAN Multidrug resistance-associated protein 4 OS=Homo sapiens OX=9606 GN=ABCC4 PE=1 SV=3//2.93915e-12
Opl0009670.1	69.9011	154.498	-1.1442	0.00044036	0.026388	gnl|BL_ORD_ID|103367 sp|Q9D844|DNJC4_MOUSE DnaJ homolog subfamily C member 4 OS=Mus musculus OX=10090 GN=Dnajc4 PE=2 SV=2//2.14124e-52
Opl0224540.1	55.7056	123.059	-1.1435	0.00079979	0.040435	gnl|BL_ORD_ID|94845 sp|Q3SZ40|DDX56_BOVIN Probable ATP-dependent RNA helicase DDX56 OS=Bos taurus OX=9913 GN=DDX56 PE=2 SV=1//0
Opl0115920.1	54.7768	120.867	-1.1418	0.00092972	0.045036	gnl|BL_ORD_ID|93927 sp|O94760|DDAH1_HUMAN N(G),N(G)-dimethylarginine dimethylaminohydrolase 1 OS=Homo sapiens OX=9606 GN=DDAH1 PE=1 SV=3//1.03856e-36
Opl0078960.1	110.066	242.842	-1.1417	0.00014028	0.0114	gnl|BL_ORD_ID|500039 sp|Q969X6|UTP4_HUMAN U3 small nucleolar RNA-associated protein 4 homolog OS=Homo sapiens OX=9606 GN=UTP4 PE=1 SV=1//0
Opl0060060.1	61.7679	136.077	-1.1395	0.00051339	0.029266	gnl|BL_ORD_ID|4384 sp|Q802V6|ABH2A_DANRE Monoacylglycerol lipase ABHD2-A OS=Danio rerio OX=7955 GN=abhd2a PE=2 SV=1//0
Opl0044440.1	2259.03	4962.11	-1.1353	3.58e-05	0.0039146	gnl|BL_ORD_ID|438677 sp|Q9NYB5|SO1C1_HUMAN Solute carrier organic anion transporter family member 1C1 OS=Homo sapiens OX=9606 GN=SLCO1C1 PE=2 SV=1//0
Opl0224610.1	84.6942	184.306	-1.1218	0.00047116	0.027743	gnl|BL_ORD_ID|168998 sp|Q7SY48|HEAT1_DANRE HEAT repeat-containing protein 1 OS=Danio rerio OX=7955 GN=heatr1 PE=2 SV=1//0
Opl0050360.1	297.868	648.173	-1.1217	9.67e-05	0.0087319	gnl|BL_ORD_ID|290341 sp|P50580|PA2G4_MOUSE Proliferation-associated protein 2G4 OS=Mus musculus OX=10090 GN=Pa2g4 PE=1 SV=3//0
Opl0065640.1	1482.71	3220.68	-1.1191	0.00055279	0.031151	gnl|BL_ORD_ID|475148 sp|Q7ZVP8|TM38B_DANRE Trimeric intracellular cation channel type B OS=Danio rerio OX=7955 GN=tmem38b PE=2 SV=1//2.56133e-116
Opl0119800.1	81.1739	175.555	-1.1128	0.00049334	0.028453	gnl|BL_ORD_ID|495260 sp|Q5R514|UMPS_PONAB Uridine 5'-monophosphate synthase OS=Pongo abelii OX=9601 GN=UMPS PE=2 SV=1//0
Opl0021680.1	144.989	313.522	-1.1126	0.00058164	0.03259	gnl|BL_ORD_ID|469962 sp|Q9BWD1|THIC_HUMAN Acetyl-CoA acetyltransferase, cytosolic OS=Homo sapiens OX=9606 GN=ACAT2 PE=1 SV=2//0
Opl0117360.1	55.2758	119.33	-1.1102	0.0010199	0.048102	gnl|BL_ORD_ID|237413 sp|Q6GMK0|MGT4B_DANRE Alpha-1,3-mannosyl-glycoprotein 4-beta-N-acetylglucosaminyltransferase B OS=Danio rerio OX=7955 GN=mgat4b PE=2 SV=1//0
Novel00336	152.079	328.278	-1.1101	0.00016098	0.012757	PREDICTED: arf-GAP with coiled-coil, ANK repeat and PH domain-containing protein 2-like [Notothenia coriiceps]
Opl0174580.1	280.035	603.902	-1.1087	8.71e-05	0.008137	gnl|BL_ORD_ID|296241 sp|Q9JK42|PDK2_MOUSE [Pyruvate dehydrogenase (acetyl-transferring)] kinase isozyme 2, mitochondrial OS=Mus musculus OX=10090 GN=Pdk2 PE=1 SV=2//0
Opl0186890.1	131.748	283.512	-1.1056	0.00023844	0.016868	gnl|BL_ORD_ID|272013 sp|Q9Y2X3|NOP58_HUMAN Nucleolar protein 58 OS=Homo sapiens OX=9606 GN=NOP58 PE=1 SV=1//0
Opl0121700.1	73.5192	158.019	-1.1039	0.00067757	0.036509	gnl|BL_ORD_ID|476700 sp|Q5RA31|TOM20_PONAB Mitochondrial import receptor subunit TOM20 homolog OS=Pongo abelii OX=9601 GN=TOMM20 PE=2 SV=1//1.33168e-62
Opl0117990.1	78.292	167.418	-1.0965	0.000823	0.041057	gnl|BL_ORD_ID|279330 sp|P53370|NUDT6_HUMAN Nucleoside diphosphate-linked moiety X motif 6 OS=Homo sapiens OX=9606 GN=NUDT6 PE=1 SV=2//1.32904e-126
Opl0191310.1	263.687	561.848	-1.0914	0.00017752	0.013638	gnl|BL_ORD_ID|21043 sp|Q99K28|ARFG2_MOUSE ADP-ribosylation factor GTPase-activating protein 2 OS=Mus musculus OX=10090 GN=Arfgap2 PE=1 SV=1//0
Opl0000940.1	106.568	226.982	-1.0908	0.00040287	0.024838	gnl|BL_ORD_ID|110091 sp|Q5U4C9|DYRK2_MOUSE Dual specificity tyrosine-phosphorylation-regulated kinase 2 OS=Mus musculus OX=10090 GN=Dyrk2 PE=2 SV=1//0
Opl0103540.1	140.576	299.407	-1.0908	0.00033734	0.021896	gnl|BL_ORD_ID|217205 sp|G5E5X0|LIMD1_BOVIN LIM domain-containing protein 1 OS=Bos taurus OX=9913 GN=LIMD1 PE=3 SV=1//1.32424e-23
Opl0210790.1	275.552	584.452	-1.0848	0.0002032	0.015114	gnl|BL_ORD_ID|494011 sp|Q9Y4X1|UD2A1_HUMAN UDP-glucuronosyltransferase 2A1 OS=Homo sapiens OX=9606 GN=UGT2A1 PE=1 SV=2//1.53122e-174
Opl0081780.1	464.311	980.981	-1.0791	0.00073093	0.038497	gnl|BL_ORD_ID|271730 sp|Q13823|NOG2_HUMAN Nucleolar GTP-binding protein 2 OS=Homo sapiens OX=9606 GN=GNL2 PE=1 SV=1//0
Opl0169010.1	144.851	305.611	-1.0771	0.00037289	0.02343	gnl|BL_ORD_ID|122662 sp|Q9DCM0|ETHE1_MOUSE Persulfide dioxygenase ETHE1, mitochondrial OS=Mus musculus OX=10090 GN=Ethe1 PE=1 SV=2//1.50901e-56
Opl0086900.1	218.494	459.862	-1.0736	0.00032008	0.021054	gnl|BL_ORD_ID|556141 sp|Q5ZMM5|ZN706_CHICK Zinc finger protein 706 OS=Gallus gallus OX=9031 GN=ZNF706 PE=3 SV=1//5.5476e-34
Opl0171610.1	391.744	823.368	-1.0716	0.00019532	0.014831	gnl|BL_ORD_ID|61330 sp|Q5ZL72|CH60_CHICK 60 kDa heat shock protein, mitochondrial OS=Gallus gallus OX=9031 GN=HSPD1 PE=1 SV=1//0
Opl0180280.1	146.898	307.617	-1.0663	0.0003999	0.024732	gnl|BL_ORD_ID|41493 sp|Q5BJJ7|BCCIP_DANRE Protein BCCIP homolog OS=Danio rerio OX=7955 GN=bccip PE=2 SV=1//4.43385e-118
Opl0196380.1	218.524	456.797	-1.0638	0.00032009	0.021054	gnl|BL_ORD_ID|421852 sp|Q6NZS4|RTCB_DANRE tRNA-splicing ligase RtcB homolog OS=Danio rerio OX=7955 GN=rtcb PE=2 SV=1//0
Opl0115850.1	92.1632	191.531	-1.0553	0.00092726	0.045036	gnl|BL_ORD_ID|110909 sp|Q9D903|EBP2_MOUSE Probable rRNA-processing protein EBP2 OS=Mus musculus OX=10090 GN=Ebna1bp2 PE=2 SV=1//3.93841e-94
Opl0015670.1	288.97	598.73	-1.051	0.00023537	0.016745	gnl|BL_ORD_ID|103309 sp|Q2HJ94|DNJA2_BOVIN DnaJ homolog subfamily A member 2 OS=Bos taurus OX=9913 GN=DNAJA2 PE=2 SV=1//0
Opl0030440.1	186.207	384.834	-1.0473	0.00036544	0.023184	gnl|BL_ORD_ID|117491 sp|P49697|EM55_TAKRU 55 kDa erythrocyte membrane protein OS=Takifugu rubripes OX=31033 GN=mpp1 PE=3 SV=1//0
Novel00706	95.8484	198.036	-1.0469	0.00082461	0.041057	-//-
Opl0163460.1	371.129	765.507	-1.0445	0.00020735	0.015273	gnl|BL_ORD_ID|462602 sp|Q28BP2|T150A_XENTR Transmembrane protein 150A OS=Xenopus tropicalis OX=8364 GN=tmem150a PE=2 SV=1//3.31022e-95
Opl0142050.1	533.546	1098.74	-1.0422	0.00015539	0.012372	gnl|BL_ORD_ID|474862 sp|Q6DFQ7|TM198_XENTR Transmembrane protein 198 OS=Xenopus tropicalis OX=8364 GN=tmem198 PE=1 SV=1//1.38123e-68
Opl0032470.1	2887.54	5900.97	-1.0311	0.00020366	0.015114	gnl|BL_ORD_ID|425281 sp|O57379|S22A6_PSEAM Solute carrier family 22 member 6 OS=Pseudopleuronectes americanus OX=8265 GN=SLC22A6 PE=1 SV=1//0
Opl0019260.1	166.174	339.492	-1.0307	0.00047712	0.02801	gnl|BL_ORD_ID|380952 sp|Q6DKI1|RL7L_HUMAN 60S ribosomal protein L7-like 1 OS=Homo sapiens OX=9606 GN=RPL7L1 PE=1 SV=1//5.88597e-98
Opl0086260.1	1632.87	3306.09	-1.0177	0.00019171	0.014671	gnl|BL_ORD_ID|39792 sp|O14977|AZIN1_HUMAN Antizyme inhibitor 1 OS=Homo sapiens OX=9606 GN=AZIN1 PE=1 SV=2//1.18739e-166
Opl0017610.1	108.118	217.773	-1.0102	0.00098204	0.046765	gnl|BL_ORD_ID|468410 sp|Q9H5Q4|TFB2M_HUMAN Dimethyladenosine transferase 2, mitochondrial OS=Homo sapiens OX=9606 GN=TFB2M PE=1 SV=1//2.55553e-84
Opl0058870.1	185.424	370.251	-0.99767	0.00085444	0.042328	gnl|BL_ORD_ID|385715 sp|Q3T0J3|RM16_BOVIN 39S ribosomal protein L16, mitochondrial OS=Bos taurus OX=9913 GN=MRPL16 PE=1 SV=1//8.9397e-69
Opl0214740.1	136.381	272.247	-0.99727	0.00090483	0.044157	-//-
Opl0162090.1	136.923	273.23	-0.99676	0.00098075	0.046765	gnl|BL_ORD_ID|94729 sp|Q9NVP1|DDX18_HUMAN ATP-dependent RNA helicase DDX18 OS=Homo sapiens OX=9606 GN=DDX18 PE=1 SV=2//0
Opl0189140.1	159.074	316.273	-0.99148	0.0010476	0.048821	gnl|BL_ORD_ID|429930 sp|Q5XFW8|SEC13_RAT Protein SEC13 homolog OS=Rattus norvegicus OX=10116 GN=Sec13 PE=1 SV=1//0
Opl0112330.1	240.637	478.193	-0.99073	0.00043144	0.026108	gnl|BL_ORD_ID|140488 sp|A3RK74|FX1AA_DANRE Forkhead box protein O1-A OS=Danio rerio OX=7955 GN=foxo1a PE=2 SV=1//0
Opl0168500.1	200.178	397.529	-0.98978	0.00078845	0.040435	gnl|BL_ORD_ID|476747 sp|O94826|TOM70_HUMAN Mitochondrial import receptor subunit TOM70 OS=Homo sapiens OX=9606 GN=TOMM70 PE=1 SV=1//0
Opl0127590.1	514.917	1013.86	-0.97744	0.00061728	0.034101	gnl|BL_ORD_ID|82904 sp|Q7YRK6|CX6B1_TARSY Cytochrome c oxidase subunit 6B1 OS=Tarsius syrichta OX=1868482 GN=COX6B1 PE=3 SV=3//3.50856e-46
Opl0194190.1	158.705	312.239	-0.97631	0.00080035	0.040435	gnl|BL_ORD_ID|425698 sp|Q5SPB1|S38A2_DANRE Sodium-coupled neutral amino acid transporter 2 OS=Danio rerio OX=7955 GN=slc38a2 PE=3 SV=1//0
Opl0212030.1	369.393	724.733	-0.97229	0.00060683	0.033809	gnl|BL_ORD_ID|4195 sp|P61222|ABCE1_MOUSE ATP-binding cassette sub-family E member 1 OS=Mus musculus OX=10090 GN=Abce1 PE=1 SV=1//0
Opl0083500.1	387.653	760.501	-0.97219	0.00068085	0.036585	gnl|BL_ORD_ID|262834 sp|O54697|NALDL_RAT N-acetylated-alpha-linked acidic dipeptidase-like protein OS=Rattus norvegicus OX=10116 GN=Naaladl1 PE=1 SV=1//0
Opl0193370.1	1096.13	2144.06	-0.96793	0.00049148	0.028429	gnl|BL_ORD_ID|47857 sp|Q6PD83|BZW1A_DANRE Basic leucine zipper and W2 domain-containing protein 1-A OS=Danio rerio OX=7955 GN=bzw1a PE=2 SV=1//0
Opl0059340.1	528.177	1024.94	-0.95645	0.00079106	0.040435	gnl|BL_ORD_ID|328008 sp|P31939|PUR9_HUMAN Bifunctional purine biosynthesis protein PURH OS=Homo sapiens OX=9606 GN=ATIC PE=1 SV=3//0
Opl0148130.1	395.238	765.023	-0.95278	0.00089611	0.04384	gnl|BL_ORD_ID|335257 sp|P22695|QCR2_HUMAN Cytochrome b-c1 complex subunit 2, mitochondrial OS=Homo sapiens OX=9606 GN=UQCRC2 PE=1 SV=3//0
Opl0130690.1	517.507	998.974	-0.94887	0.00068942	0.036945	gnl|BL_ORD_ID|293256 sp|Q8R189|PAQRA_MOUSE Monocyte to macrophage differentiation factor 2 OS=Mus musculus OX=10090 GN=Mmd2 PE=2 SV=1//4.03753e-114
Opl0126620.1	1197.25	2292.52	-0.93721	0.00054795	0.030967	gnl|BL_ORD_ID|82864 sp|P51915|CX32_MICUN Gap junction Cx32.2 protein OS=Micropogonias undulatus OX=29154 PE=2 SV=2//0
Opl0005080.1	254.337	485.944	-0.93405	0.00099027	0.047042	gnl|BL_ORD_ID|125437 sp|Q96KR6|F210B_HUMAN Protein FAM210B, mitochondrial OS=Homo sapiens OX=9606 GN=FAM210B PE=1 SV=2//2.73455e-50
Opl0078710.1	250.104	476.872	-0.93107	0.00086294	0.042642	gnl|BL_ORD_ID|289513 sp|P09131|P3_HUMAN P3 protein OS=Homo sapiens OX=9606 GN=SLC10A3 PE=2 SV=1//1.14045e-126
Opl0219870.1	1064.71	2029.71	-0.93082	0.00076109	0.039814	gnl|BL_ORD_ID|218889 sp|Q6S9C8|LKHA4_CHILA Leukotriene A-4 hydrolase OS=Chinchilla lanigera OX=34839 GN=LTA4H PE=2 SV=3//0
Opl0109550.1	1288	684.192	0.91266	0.00082107	0.041057	gnl|BL_ORD_ID|23058 sp|Q67FQ3|ARHB_XENLA Low density lipoprotein receptor adapter protein 1-B OS=Xenopus laevis OX=8355 GN=ldlrap1-b PE=1 SV=1//9.87141e-101
Opl0113500.1	2297.09	1190.1	0.94873	0.00044358	0.026436	gnl|BL_ORD_ID|4720 sp|P45953|ACADV_RAT Very long-chain specific acyl-CoA dehydrogenase, mitochondrial OS=Rattus norvegicus OX=10116 GN=Acadvl PE=1 SV=1//0
Opl0070850.1	353.635	182.079	0.95769	0.00094966	0.045777	gnl|BL_ORD_ID|337567 sp|P35295|RAB20_MOUSE Ras-related protein Rab-20 OS=Mus musculus OX=10090 GN=Rab20 PE=2 SV=2//1.1712e-98
Opl0023680.1	307.946	158.421	0.95891	0.0010434	0.048742	gnl|BL_ORD_ID|474895 sp|Q7SY31|TM206_DANRE Transmembrane protein 206 OS=Danio rerio OX=7955 GN=tmem206 PE=2 SV=1//5.52839e-163
Opl0155190.1	351.583	178.974	0.97411	0.00094184	0.045511	gnl|BL_ORD_ID|298520 sp|Q7YRH6|PEMT_BOVIN Phosphatidylethanolamine N-methyltransferase OS=Bos taurus OX=9913 GN=PEMT PE=2 SV=1//8.72363e-76
Opl0098130.1	255.793	129.887	0.97773	0.00099858	0.047323	gnl|BL_ORD_ID|425503 sp|O14975|S27A2_HUMAN Very long-chain acyl-CoA synthetase OS=Homo sapiens OX=9606 GN=SLC27A2 PE=1 SV=2//0
Novel00864	580.55	292.538	0.9888	0.00051882	0.02949	-//-
Opl0162390.1	534.066	268.402	0.99262	0.00050131	0.028829	gnl|BL_ORD_ID|6344 sp|Q92035|ACES_BUNFA Acetylcholinesterase OS=Bungarus fasciatus OX=8613 GN=ACHE PE=1 SV=2//2.16903e-160
Opl0054000.1	238.414	119.328	0.99854	0.00088122	0.043219	gnl|BL_ORD_ID|511793 sp|Q1JPJ2|XPP1_BOVIN Xaa-Pro aminopeptidase 1 OS=Bos taurus OX=9913 GN=XPNPEP1 PE=2 SV=1//0
Opl0113300.1	223.347	111.424	1.0032	0.0010395	0.048675	gnl|BL_ORD_ID|554674 sp|Q9P1Z0|ZBTB4_HUMAN Zinc finger and BTB domain-containing protein 4 OS=Homo sapiens OX=9606 GN=ZBTB4 PE=1 SV=3//8.73389e-07
Opl0080580.1	317.508	158.072	1.0062	0.00087659	0.0431	gnl|BL_ORD_ID|48108 sp|Q6P6T1|C1S_RAT Complement C1s subcomponent OS=Rattus norvegicus OX=10116 GN=C1s PE=2 SV=2//3.12657e-127
Opl0046040.1	233.743	115.876	1.0123	0.0010792	0.049807	gnl|BL_ORD_ID|425961 sp|P48065|S6A12_HUMAN Sodium- and chloride-dependent betaine transporter OS=Homo sapiens OX=9606 GN=SLC6A12 PE=1 SV=2//0
Opl0101740.1	1111.24	546.449	1.024	0.00019972	0.014992	gnl|BL_ORD_ID|494013 sp|P36510|UD2A1_RAT UDP-glucuronosyltransferase 2A1 OS=Rattus norvegicus OX=10116 GN=Ugt2a1 PE=2 SV=1//2.1253e-140
Opl0119220.1	192.645	94.4732	1.028	0.0010229	0.04813	-//-
Opl0113220.1	586.921	287.622	1.029	0.00017367	0.013394	gnl|BL_ORD_ID|539239 sp|P45441|YBX2B_XENLA Y-box-binding protein 2-B OS=Xenopus laevis OX=8355 GN=ybx2-b PE=1 SV=2//8.10902e-52
Opl0017670.1	320.429	155.891	1.0395	0.00035311	0.022621	gnl|BL_ORD_ID|11068 sp|Q8VDL4|ADPGK_MOUSE ADP-dependent glucokinase OS=Mus musculus OX=10090 GN=Adpgk PE=1 SV=2//3.85262e-63
Opl0081500.1	386.435	186.758	1.0491	0.00038132	0.023733	gnl|BL_ORD_ID|76436 sp|Q64462|CP4B1_MOUSE Cytochrome P450 4B1 OS=Mus musculus OX=10090 GN=Cyp4b1 PE=1 SV=1//7.28002e-153
Opl0159400.1	158.656	76.6153	1.0502	0.00087616	0.0431	gnl|BL_ORD_ID|391262 sp|Q92753|RORB_HUMAN Nuclear receptor ROR-beta OS=Homo sapiens OX=9606 GN=RORB PE=1 SV=3//0
Opl0000400.1	1366.35	659.501	1.0509	0.00022248	0.016086	gnl|BL_ORD_ID|200247 sp|Q6NWF6|K2C8_DANRE Keratin, type II cytoskeletal 8 OS=Danio rerio OX=7955 GN=krt8 PE=1 SV=1//0
Opl0011820.1	145.472	69.8753	1.0579	0.0010625	0.049399	gnl|BL_ORD_ID|275663 sp|O88491|NSD1_MOUSE Histone-lysine N-methyltransferase, H3 lysine-36 and H4 lysine-20 specific OS=Mus musculus OX=10090 GN=Nsd1 PE=1 SV=1//0
Opl0083260.1	170.385	81.2807	1.0678	0.00072355	0.038253	gnl|BL_ORD_ID|56333 sp|Q16589|CCNG2_HUMAN Cyclin-G2 OS=Homo sapiens OX=9606 GN=CCNG2 PE=2 SV=1//5.65005e-99
Opl0037780.1	788.764	375.225	1.0718	0.0001119	0.0094857	gnl|BL_ORD_ID|249875 sp|Q6NW52|MSRB2_DANRE Methionine-R-sulfoxide reductase B2, mitochondrial OS=Danio rerio OX=7955 GN=msrb2 PE=2 SV=1//3.02562e-104
Opl0123180.1	319.939	151.708	1.0765	0.00042335	0.025698	gnl|BL_ORD_ID|306570 sp|Q9QXS1|PLEC_MOUSE Plectin OS=Mus musculus OX=10090 GN=Plec PE=1 SV=3//2.20979e-21
Opl0090320.1	254.741	120.536	1.0796	0.00037555	0.023522	gnl|BL_ORD_ID|427876 sp|Q9BY12|SCAPE_HUMAN S phase cyclin A-associated protein in the endoplasmic reticulum OS=Homo sapiens OX=9606 GN=SCAPER PE=1 SV=2//7.80474e-100
Opl0109150.1	172.418	80.8594	1.0924	0.00048691	0.028332	gnl|BL_ORD_ID|273712 sp|P97947|NR0B2_RAT Nuclear receptor subfamily 0 group B member 2 OS=Rattus norvegicus OX=10116 GN=Nr0b2 PE=1 SV=1//9.52842e-63
Opl0183790.1	455.85	210.921	1.1119	0.00080184	0.040435	gnl|BL_ORD_ID|438216 sp|Q70E20|SNED1_MOUSE Sushi, nidogen and EGF-like domain-containing protein 1 OS=Mus musculus OX=10090 GN=Sned1 PE=2 SV=2//0
Opl0104880.1	318.276	147.246	1.112	0.00022591	0.016275	gnl|BL_ORD_ID|259802 sp|Q13459|MYO9B_HUMAN Unconventional myosin-IXb OS=Homo sapiens OX=9606 GN=MYO9B PE=1 SV=3//2.42298e-21
Opl0195330.1	210.428	96.9396	1.1182	0.000412	0.025321	gnl|BL_ORD_ID|285323 sp|O60502|OGA_HUMAN Protein O-GlcNAcase OS=Homo sapiens OX=9606 GN=MGEA5 PE=1 SV=2//0
Opl0179840.1	115.446	53.0221	1.1226	0.00096206	0.046064	gnl|BL_ORD_ID|112259 sp|O00418|EF2K_HUMAN Eukaryotic elongation factor 2 kinase OS=Homo sapiens OX=9606 GN=EEF2K PE=1 SV=2//0
Opl0081000.1	150.179	68.7198	1.1279	0.0007126	0.03798	gnl|BL_ORD_ID|64076 sp|Q924A2|CIC_MOUSE Protein capicua homolog OS=Mus musculus OX=10090 GN=Cic PE=1 SV=2//5.19578e-06
Novel00310	303.871	138.072	1.138	0.00023438	0.016745	PREDICTED: stonustoxin subunit beta-like [Maylandia zebra]
Novel00737	306.474	138.946	1.1412	0.00010489	0.0090086	-//-
Opl0043680.1	173.974	78.7047	1.1443	0.00026496	0.018241	gnl|BL_ORD_ID|432907 sp|Q803X0|SERC5_DANRE Serine incorporator 5 OS=Danio rerio OX=7955 GN=serinc5 PE=2 SV=1//0
Opl0049380.1	545.898	244.366	1.1596	3.68e-05	0.0039779	gnl|BL_ORD_ID|163206 sp|Q9TSM5|GSTM1_MACFA Glutathione S-transferase Mu 1 OS=Macaca fascicularis OX=9541 GN=GSTM1 PE=2 SV=3//3.19941e-107
Opl0153300.1	162.76	72.549	1.1657	0.00033319	0.021698	gnl|BL_ORD_ID|199929 sp|Q14667|K0100_HUMAN Protein KIAA0100 OS=Homo sapiens OX=9606 GN=KIAA0100 PE=1 SV=3//1.56928e-53
Opl0036930.1	153.756	68.1252	1.1744	0.0002172	0.015764	gnl|BL_ORD_ID|4419 sp|Q5E9H9|ABHDA_BOVIN Mycophenolic acid acyl-glucuronide esterase, mitochondrial OS=Bos taurus OX=9913 GN=ABHD10 PE=2 SV=1//1.19829e-130
Opl0038650.1	189.481	81.0128	1.2258	0.00016524	0.01292	gnl|BL_ORD_ID|264625 sp|O77775|NCF2_BOVIN Neutrophil cytosol factor 2 OS=Bos taurus OX=9913 GN=NCF2 PE=2 SV=1//9.59333e-143
Opl0043480.1	233.718	99.2871	1.2351	5.49e-05	0.0055926	gnl|BL_ORD_ID|293277 sp|P25116|PAR1_HUMAN Proteinase-activated receptor 1 OS=Homo sapiens OX=9606 GN=F2R PE=1 SV=2//5.84787e-98
Opl0217360.1	207.374	88.0921	1.2352	8.97e-05	0.0082786	gnl|BL_ORD_ID|178133 sp|O19477|HMR1_RAT Major histocompatibility complex class I-related gene protein OS=Rattus norvegicus OX=10116 GN=Mr1 PE=2 SV=2//1.91414e-56
Opl0197300.1	1511.1	640.126	1.2392	7.07e-05	0.0067811	gnl|BL_ORD_ID|265993 sp|Q9WV84|NDKM_MOUSE Nucleoside diphosphate kinase, mitochondrial OS=Mus musculus OX=10090 GN=Nme4 PE=1 SV=1//1.24792e-73
Opl0165120.1	263.621	111.502	1.2414	0.00079082	0.040435	gnl|BL_ORD_ID|391262 sp|Q92753|RORB_HUMAN Nuclear receptor ROR-beta OS=Homo sapiens OX=9606 GN=RORB PE=1 SV=3//2.55904e-59
Opl0059290.1	108.272	45.4543	1.2522	0.00043598	0.026222	gnl|BL_ORD_ID|225382 sp|Q60767|LY75_MOUSE Lymphocyte antigen 75 OS=Mus musculus OX=10090 GN=Ly75 PE=1 SV=2//2.28506e-29
Opl0068780.1	84.3958	35.3403	1.2559	0.00078372	0.040435	gnl|BL_ORD_ID|512024 sp|P13010|XRCC5_HUMAN X-ray repair cross-complementing protein 5 OS=Homo sapiens OX=9606 GN=XRCC5 PE=1 SV=3//0
Opl0140720.1	534.459	220.982	1.2741	1.65e-05	0.0021445	gnl|BL_ORD_ID|2949 sp|A8K2U0|A2ML1_HUMAN Alpha-2-macroglobulin-like protein 1 OS=Homo sapiens OX=9606 GN=A2ML1 PE=1 SV=3//0
Opl0023690.1	76.392	31.3142	1.2866	0.00083946	0.041691	gnl|BL_ORD_ID|555567 sp|Q9H2Y7|ZN106_HUMAN Zinc finger protein 106 OS=Homo sapiens OX=9606 GN=ZNF106 PE=1 SV=1//2.52156e-06
Opl0064270.1	175.02	71.2427	1.2967	7.89e-05	0.0074931	-//-
Opl0025030.1	177.955	72.3016	1.2994	5.56e-05	0.0056356	gnl|BL_ORD_ID|117709 sp|Q6PJG2|EMSA1_HUMAN ELM2 and SANT domain-containing protein 1 OS=Homo sapiens OX=9606 GN=ELMSAN1 PE=1 SV=2//1.26122e-107
Opl0024040.1	7101.64	2884.2	1.3	3.44e-06	0.00062552	gnl|BL_ORD_ID|295677 sp|Q98UF7|PCX1_TAKRU Pecanex-like protein 1 OS=Takifugu rubripes OX=31033 GN=pcnx1 PE=3 SV=1//0
Opl0214100.1	96.1786	38.5689	1.3183	0.00045054	0.026734	gnl|BL_ORD_ID|198939 sp|Q63269|ITPR3_RAT Inositol 1,4,5-trisphosphate receptor type 3 OS=Rattus norvegicus OX=10116 GN=Itpr3 PE=1 SV=1//0
Opl0208780.1	202.901	80.4699	1.3343	5.05e-05	0.0052913	gnl|BL_ORD_ID|270773 sp|Q7RTR2|NLRC3_HUMAN NLR family CARD domain-containing protein 3 OS=Homo sapiens OX=9606 GN=NLRC3 PE=1 SV=2//7.02288e-74
Opl0059850.1	108.864	42.8012	1.3468	0.00016555	0.01292	gnl|BL_ORD_ID|432327 sp|Q5R7F5|SEM6D_PONAB Semaphorin-6D OS=Pongo abelii OX=9601 GN=SEMA6D PE=2 SV=1//0
Opl0004940.1	2452.18	959.677	1.3534	1.11e-06	0.00025762	gnl|BL_ORD_ID|438708 sp|O88908|SOAT2_MOUSE Sterol O-acyltransferase 2 OS=Mus musculus OX=10090 GN=Soat2 PE=1 SV=2//1.94421e-173
Opl0035300.1	85.1892	32.4639	1.3918	0.00021721	0.015764	gnl|BL_ORD_ID|195314 sp|Q90876|IRF1_CHICK Interferon regulatory factor 1 OS=Gallus gallus OX=9031 GN=IRF1 PE=2 SV=1//1.23471e-71
Opl0166610.1	70.2715	26.5443	1.4045	0.0010814	0.049807	gnl|BL_ORD_ID|348317 sp|Q08116|RGS1_HUMAN Regulator of G-protein signaling 1 OS=Homo sapiens OX=9606 GN=RGS1 PE=1 SV=3//3.85951e-51
Opl0150410.1	300.044	112.916	1.4099	0.00012625	0.010477	gnl|BL_ORD_ID|23100 sp|Q96PE2|ARHGH_HUMAN Rho guanine nucleotide exchange factor 17 OS=Homo sapiens OX=9606 GN=ARHGEF17 PE=1 SV=1//4.64253e-09
Opl0148540.1	62.2155	23.4072	1.4103	0.00033158	0.021665	gnl|BL_ORD_ID|149534 sp|Q9CPY6|GID4_MOUSE Glucose-induced degradation protein 4 homolog OS=Mus musculus OX=10090 GN=Gid4 PE=1 SV=1//6.12687e-116
Opl0207940.1	61.24	22.8483	1.4224	0.00072271	0.038253	gnl|BL_ORD_ID|264624 sp|F1M707|NCF1_RAT Neutrophil cytosolic factor 1 OS=Rattus norvegicus OX=10116 GN=Ncf1 PE=1 SV=2//1.37421e-134
Opl0143830.1	194.908	72.5339	1.4261	0.00041872	0.025575	gnl|BL_ORD_ID|11021 sp|Q7Z4H4|ADM2_HUMAN ADM2 OS=Homo sapiens OX=9606 GN=ADM2 PE=2 SV=1//1.03363e-19
Opl0152810.1	94.7083	34.6817	1.4493	8.57e-05	0.0080598	gnl|BL_ORD_ID|91406 sp|Q9P219|DAPLE_HUMAN Protein Daple OS=Homo sapiens OX=9606 GN=CCDC88C PE=1 SV=3//1.93161e-18
Opl0152610.1	232.456	84.1313	1.4662	0.00037903	0.023664	gnl|BL_ORD_ID|202763 sp|O95279|KCNK5_HUMAN Potassium channel subfamily K member 5 OS=Homo sapiens OX=9606 GN=KCNK5 PE=1 SV=1//7.54211e-153
Opl0083940.1	70.2224	25.3769	1.4684	0.00016509	0.01292	gnl|BL_ORD_ID|159933 sp|A3KGT9|GPT3L_DANRE Glycerol-3-phosphate acyltransferase 3-like OS=Danio rerio OX=7955 GN=agpat9l PE=3 SV=1//0
Opl0187570.1	596.517	215.21	1.4708	6.38e-07	0.00015499	gnl|BL_ORD_ID|78951 sp|P97784|CRY1_MOUSE Cryptochrome-1 OS=Mus musculus OX=10090 GN=Cry1 PE=1 SV=1//0
Opl0105680.1	769.705	277.631	1.4711	2.75e-07	7.2e-05	gnl|BL_ORD_ID|272611 sp|O15118|NPC1_HUMAN NPC intracellular cholesterol transporter 1 OS=Homo sapiens OX=9606 GN=NPC1 PE=1 SV=2//0
Opl0029880.1	189.007	67.9635	1.4756	0.00017063	0.013264	gnl|BL_ORD_ID|251615 sp|Q9NYA4|MTMR4_HUMAN Myotubularin-related protein 4 OS=Homo sapiens OX=9606 GN=MTMR4 PE=1 SV=2//9.86637e-70
Opl0062490.1	134.224	48.2204	1.4769	1.82e-05	0.0022893	gnl|BL_ORD_ID|446436 sp|Q9P2F5|STOX2_HUMAN Storkhead-box protein 2 OS=Homo sapiens OX=9606 GN=STOX2 PE=2 SV=2//0
Opl0063580.1	83.9616	30.0988	1.48	7.44e-05	0.0071019	gnl|BL_ORD_ID|66017 sp|Q8QGQ6|CLOCK_CHICK Circadian locomoter output cycles protein kaput OS=Gallus gallus OX=9031 GN=CLOCK PE=1 SV=2//6.38231e-08
Opl0109910.1	244.631	87.2529	1.4873	1.15e-06	0.00026085	gnl|BL_ORD_ID|556393 sp|Q08CN9|ZNRF2_DANRE E3 ubiquitin-protein ligase znrf2 OS=Danio rerio OX=7955 GN=znrf2 PE=2 SV=1//1.16598e-70
Opl0088890.1	469.598	167.074	1.4909	3.07e-07	7.95e-05	gnl|BL_ORD_ID|442797 sp|Q9Y6N5|SQOR_HUMAN Sulfide:quinone oxidoreductase, mitochondrial OS=Homo sapiens OX=9606 GN=SQOR PE=1 SV=1//0
Opl0035710.1	63.5508	22.584	1.4926	0.00029395	0.019798	gnl|BL_ORD_ID|220525 sp|Q99PI5|LPIN2_MOUSE Phosphatidate phosphatase LPIN2 OS=Mus musculus OX=10090 GN=Lpin2 PE=1 SV=2//0
Opl0208030.1	1046.82	369.451	1.5026	0.000249	0.017366	gnl|BL_ORD_ID|289455 sp|A4QNZ7|P33MX_DANRE Putative monooxygenase p33MONOX OS=Danio rerio OX=7955 GN=p33monox PE=1 SV=1//7.77022e-113
Opl0118910.1	69.6997	24.5564	1.5051	0.00023331	0.016745	gnl|BL_ORD_ID|445885 sp|P42224|STAT1_HUMAN Signal transducer and activator of transcription 1-alpha/beta OS=Homo sapiens OX=9606 GN=STAT1 PE=1 SV=2//7.61828e-150
Opl0106740.1	89.3874	31.3648	1.5109	7.02e-05	0.0067726	gnl|BL_ORD_ID|3536 sp|Q9UGJ0|AAKG2_HUMAN 5&apos;-AMP-activated protein kinase subunit gamma-2 OS=Homo sapiens OX=9606 GN=PRKAG2 PE=1 SV=1//0
Opl0129310.1	169.808	59.3932	1.5155	6.06e-06	0.0010051	gnl|BL_ORD_ID|306419 sp|Q99P84|PLCE1_RAT 1-phosphatidylinositol 4,5-bisphosphate phosphodiesterase epsilon-1 OS=Rattus norvegicus OX=10116 GN=Plce1 PE=1 SV=1//1.16329e-08
Opl0154150.1	76.2869	26.5924	1.5204	0.00010947	0.0093204	gnl|BL_ORD_ID|437407 sp|P50532|SMC4_XENLA Structural maintenance of chromosomes protein 4 OS=Xenopus laevis OX=8355 GN=smc4 PE=1 SV=1//0
Opl0045090.1	278.874	95.0752	1.5525	0.00025398	0.017588	gnl|BL_ORD_ID|13787 sp|P07943|ALDR_RAT Aldose reductase OS=Rattus norvegicus OX=10116 GN=Akr1b1 PE=1 SV=3//9.87647e-105
Opl0042740.1	54.6724	18.3124	1.578	0.00026771	0.018345	gnl|BL_ORD_ID|8775 sp|Q9JID6|ACSL1_CAVPO Long-chain-fatty-acid--CoA ligase 1 OS=Cavia porcellus OX=10141 GN=ACSL1 PE=2 SV=1//0
Opl0118920.1	139.838	46.1777	1.5985	4.5e-06	0.00079025	gnl|BL_ORD_ID|155036 sp|D3Z7P3|GLSK_MOUSE Glutaminase kidney isoform, mitochondrial OS=Mus musculus OX=10090 GN=Gls PE=1 SV=1//0
Opl0044870.1	94.2969	31.0562	1.6023	1.48e-05	0.0019688	gnl|BL_ORD_ID|58057 sp|P46527|CDN1B_HUMAN Cyclin-dependent kinase inhibitor 1B OS=Homo sapiens OX=9606 GN=CDKN1B PE=1 SV=1//5.16084e-12
Novel00110	54.118	16.5245	1.7115	9.64e-05	0.0087319	PREDICTED: signal transducer and activator of transcription 1-alpha/beta isoform X2 [Larimichthys crocea]
Opl0036100.1	1986.72	602.59	1.7211	1.19e-09	7.73e-07	gnl|BL_ORD_ID|193667 sp|Q8AV61|INSI1_DANRE Insulin-induced gene 1 protein OS=Danio rerio OX=7955 GN=insig1 PE=2 SV=1//2.62073e-131
Opl0056240.1	99.5431	30.0099	1.7299	0.00096264	0.046064	gnl|BL_ORD_ID|271477 sp|P79942|NOCT_XENLA Nocturnin OS=Xenopus laevis OX=8355 GN=noct PE=1 SV=1//5.06565e-154
Opl0156440.1	161.668	48.6462	1.7326	3.2e-07	8.16e-05	gnl|BL_ORD_ID|125557 sp|Q6DTY7|F264_MOUSE 6-phosphofructo-2-kinase/fructose-2,6-bisphosphatase 4 OS=Mus musculus OX=10090 GN=Pfkfb4 PE=2 SV=4//0
Opl0103080.1	53.5094	16.0998	1.7327	6.68e-05	0.006537	gnl|BL_ORD_ID|479804 sp|O75962|TRIO_HUMAN Triple functional domain protein OS=Homo sapiens OX=9606 GN=TRIO PE=1 SV=2//4.3168e-42
Opl0112820.1	84.8569	25.5138	1.7338	3.55e-05	0.0038955	gnl|BL_ORD_ID|390962 sp|Q9HCK4|ROBO2_HUMAN Roundabout homolog 2 OS=Homo sapiens OX=9606 GN=ROBO2 PE=1 SV=2//2.02569e-39
Opl0064700.1	169.946	50.5307	1.7498	2.08e-06	0.00040883	gnl|BL_ORD_ID|493810 sp|Q66I71|UCK1_DANRE Uridine-cytidine kinase 1 OS=Danio rerio OX=7955 GN=uck1 PE=2 SV=1//2.4657e-168
Opl0105100.1	70.7732	20.6743	1.7754	0.0010763	0.049806	-//-
Opl0106350.1	400.308	116.678	1.7786	2.61e-05	0.0030251	gnl|BL_ORD_ID|13502 sp|Q6GM82|ALAT2_XENLA Alanine aminotransferase 2 OS=Xenopus laevis OX=8355 GN=gpt2 PE=2 SV=1//2.07413e-164
Opl0098170.1	57.0523	16.6111	1.7801	2.15e-05	0.0025898	gnl|BL_ORD_ID|268263 sp|Q68EL6|NFIL3_DANRE Nuclear factor interleukin-3-regulated protein OS=Danio rerio OX=7955 GN=nfil3 PE=2 SV=1//2.63826e-162
Opl0128130.1	78.0011	21.4756	1.8608	1.24e-06	0.00026719	gnl|BL_ORD_ID|442332 sp|Q571F5|SPSB3_MOUSE SPRY domain-containing SOCS box protein 3 OS=Mus musculus OX=10090 GN=Spsb3 PE=2 SV=2//6.12397e-142
Opl0163870.1	29.7734	8.16929	1.8657	0.00092933	0.045036	gnl|BL_ORD_ID|499441 sp|P48733|UROM_BOVIN Uromodulin OS=Bos taurus OX=9913 GN=UMOD PE=2 SV=1//3.47328e-36
Novel00389	31.7044	8.51922	1.8959	0.00028905	0.019535	hypothetical protein EH28_05819 [Larimichthys crocea]
Opl0022080.1	37.7605	10.0935	1.9034	0.00012974	0.010721	gnl|BL_ORD_ID|337620 sp|Q06AU5|RAB32_PIG Ras-related protein Rab-32 OS=Sus scrofa OX=9823 GN=RAB32 PE=2 SV=1//7.31026e-122
Novel00570	66.2273	16.888	1.9714	0.00013238	0.010803	Protein NLRC3 [Larimichthys crocea]
Opl0100300.1	3475.11	880.948	1.9799	9.43e-11	8.83e-08	gnl|BL_ORD_ID|231531 sp|Q9V0D5|MDH_PYRAB Malate dehydrogenase OS=Pyrococcus abyssi (strain GE5 / Orsay) OX=272844 GN=mdh PE=3 SV=1//4.9116e-69
Opl0073110.1	50.6836	12.7945	1.986	0.00029836	0.020026	-//-
Opl0079140.1	41.1542	9.86467	2.0607	3.12e-05	0.0035283	gnl|BL_ORD_ID|79340 sp|P21158|CSGA_MYXXA C-factor OS=Myxococcus xanthus OX=34 GN=csgA PE=1 SV=1//2.42543e-18
Opl0141500.1	24.5649	5.83704	2.0733	0.00064814	0.035408	gnl|BL_ORD_ID|122787 sp|Q9Y603|ETV7_HUMAN Transcription factor ETV7 OS=Homo sapiens OX=9606 GN=ETV7 PE=1 SV=1//7.12136e-87
Opl0096710.1	522.069	123.412	2.0808	2.21e-12	3.35e-09	gnl|BL_ORD_ID|17674 sp|Q64133|AOFA_MOUSE Amine oxidase [flavin-containing] A OS=Mus musculus OX=10090 GN=Maoa PE=1 SV=3//1.0361e-09
Opl0132070.1	39.2812	9.22125	2.0908	2.47e-05	0.0029069	gnl|BL_ORD_ID|268268 sp|Q5FW38|NFIL3_XENTR Nuclear factor interleukin-3-regulated protein OS=Xenopus tropicalis OX=8364 GN=nfil3 PE=2 SV=1//7.72011e-23
Novel00029	26.1722	6.09403	2.1026	0.00069425	0.037103	PREDICTED: cAMP-responsive element modulator-like isoform X2 [Larimichthys crocea]
Opl0220650.1	48.9788	11.3512	2.1093	6.89e-06	0.0010838	gnl|BL_ORD_ID|312082 sp|Q6NUP7|PP4R4_HUMAN Serine/threonine-protein phosphatase 4 regulatory subunit 4 OS=Homo sapiens OX=9606 GN=PPP4R4 PE=1 SV=1//0
Opl0222590.1	76.0795	17.0958	2.1539	5.75e-08	1.88e-05	gnl|BL_ORD_ID|45388 sp|Q6YGZ5|BMAL1_TYTAL Aryl hydrocarbon receptor nuclear translocator-like protein 1 OS=Tyto alba OX=56313 GN=ARNTL PE=2 SV=1//0
Opl0044700.1	55.155	12.1803	2.1789	1.19e-05	0.0016657	gnl|BL_ORD_ID|185858 sp|Q6ZVW7|I17EL_HUMAN Putative interleukin-17 receptor E-like OS=Homo sapiens OX=9606 GN=IL17REL PE=2 SV=2//5.05764e-54
Opl0143030.1	838.813	180.816	2.2138	8.05e-09	3.6e-06	gnl|BL_ORD_ID|245665 sp|Q3MHW6|MOT1_BOVIN Monocarboxylate transporter 1 OS=Bos taurus OX=9913 GN=SLC16A1 PE=2 SV=2//0
Opl0055580.1	18.5595	3.89659	2.2519	0.00081619	0.040949	gnl|BL_ORD_ID|268268 sp|Q5FW38|NFIL3_XENTR Nuclear factor interleukin-3-regulated protein OS=Xenopus tropicalis OX=8364 GN=nfil3 PE=2 SV=1//2.94707e-34
Opl0150400.1	23.5124	4.89478	2.2641	0.00036249	0.023071	gnl|BL_ORD_ID|478896 sp|Q9N092|TR19L_MACFA Tumor necrosis factor receptor superfamily member 19L OS=Macaca fascicularis OX=9541 GN=RELT PE=2 SV=1//1.59656e-40
Opl0091820.1	34.6346	6.93341	2.3206	1.14e-05	0.0016267	gnl|BL_ORD_ID|45380 sp|Q9I8T7|BMAL1_CHICK Aryl hydrocarbon receptor nuclear translocator-like protein 1 OS=Gallus gallus OX=9031 GN=ARNTL PE=1 SV=1//0
Opl0187360.1	101.544	19.788	2.3594	3.44e-08	1.17e-05	gnl|BL_ORD_ID|140779 sp|O60478|G137B_HUMAN Integral membrane protein GPR137B OS=Homo sapiens OX=9606 GN=GPR137B PE=2 SV=1//3.5075e-76
Opl0047930.1	253.502	47.0132	2.4309	0.00013035	0.010726	gnl|BL_ORD_ID|237046 sp|O35678|MGLL_MOUSE Monoglyceride lipase OS=Mus musculus OX=10090 GN=Mgll PE=1 SV=1//2.20426e-131
Opl0215900.1	68.0445	12.4983	2.4447	1.12e-05	0.0016021	gnl|BL_ORD_ID|425128 sp|Q86YT5|S13A5_HUMAN Solute carrier family 13 member 5 OS=Homo sapiens OX=9606 GN=SLC13A5 PE=1 SV=1//0
Opl0130870.1	92.2146	16.0423	2.5231	6.81e-10	4.62e-07	gnl|BL_ORD_ID|54441 sp|O95931|CBX7_HUMAN Chromobox protein homolog 7 OS=Homo sapiens OX=9606 GN=CBX7 PE=1 SV=1//1.39097e-42
Opl0011880.1	45.2124	7.76756	2.5412	3.82e-07	9.63e-05	gnl|BL_ORD_ID|129817 sp|Q9UKT7|FBXL3_HUMAN F-box/LRR-repeat protein 3 OS=Homo sapiens OX=9606 GN=FBXL3 PE=1 SV=1//0
Opl0051870.1	862.02	138.446	2.6384	1.41e-05	0.0018984	gnl|BL_ORD_ID|155037 sp|P13264|GLSK_RAT Glutaminase kidney isoform, mitochondrial OS=Rattus norvegicus OX=10116 GN=Gls PE=1 SV=2//0
Opl0207550.1	24.2829	3.86212	2.6525	5.15e-05	0.0053311	gnl|BL_ORD_ID|149593 sp|Q8ND71|GIMA8_HUMAN GTPase IMAP family member 8 OS=Homo sapiens OX=9606 GN=GIMAP8 PE=2 SV=2//8.38075e-20
Opl0033050.1	34.8242	5.04099	2.7883	2.47e-06	0.00045788	gnl|BL_ORD_ID|81437 sp|P30825|CTR1_HUMAN High affinity cationic amino acid transporter 1 OS=Homo sapiens OX=9606 GN=SLC7A1 PE=1 SV=1//0
Opl0213170.1	60.9859	8.82424	2.7889	3.56e-09	1.94e-06	gnl|BL_ORD_ID|47057 sp|Q13410|BT1A1_HUMAN Butyrophilin subfamily 1 member A1 OS=Homo sapiens OX=9606 GN=BTN1A1 PE=1 SV=3//7.95353e-27
Opl0176600.1	28.3764	3.62444	2.9689	3.85e-06	0.00069463	gnl|BL_ORD_ID|149593 sp|Q8ND71|GIMA8_HUMAN GTPase IMAP family member 8 OS=Homo sapiens OX=9606 GN=GIMAP8 PE=2 SV=2//7.63354e-10
Novel00144	250.87	28.8319	3.1212	1.28e-19	8.41e-16	2-oxoglutarate dehydrogenase-like, mitochondrial [Larimichthys crocea]
Opl0077730.1	15.011	1.29328	3.5369	9.95e-05	0.0088118	gnl|BL_ORD_ID|202549 sp|Q12791|KCMA1_HUMAN Calcium-activated potassium channel subunit alpha-1 OS=Homo sapiens OX=9606 GN=KCNMA1 PE=1 SV=2//0
Opl0208020.1	11.6717	0.933407	3.6444	0.00051318	0.029266	gnl|BL_ORD_ID|349183 sp|Q5U2Z7|RHG24_RAT Rho GTPase-activating protein 24 OS=Rattus norvegicus OX=10116 GN=Arhgap24 PE=1 SV=2//1.01181e-15
Opl0035720.1	195.356	14.8661	3.716	0.00015102	0.012123	gnl|BL_ORD_ID|437749 sp|A6NHR9|SMHD1_HUMAN Structural maintenance of chromosomes flexible hinge domain-containing protein 1 OS=Homo sapiens OX=9606 GN=SMCHD1 PE=1 SV=2//0
Opl0066460.1	147.896	10.6147	3.8004	2.07e-05	0.0025646	gnl|BL_ORD_ID|316770 sp|Q9WU79|PROD_MOUSE Proline dehydrogenase 1, mitochondrial OS=Mus musculus OX=10090 GN=Prodh PE=1 SV=2//0
Opl0167960.1	24.5904	1.53618	4.0007	2.26e-07	6.45e-05	gnl|BL_ORD_ID|66017 sp|Q8QGQ6|CLOCK_CHICK Circadian locomoter output cycles protein kaput OS=Gallus gallus OX=9031 GN=CLOCK PE=1 SV=2//0
Opl0174450.1	73.1247	4.16351	4.1345	4.1e-15	1.35e-11	gnl|BL_ORD_ID|335389 sp|Q90372|QNR71_COTJA Protein QNR-71 OS=Coturnix japonica OX=93934 GN=QNR-71 PE=2 SV=2//2.95463e-24
Novel00055	349.509	14.9573	4.5464	2.71e-20	2.9e-16	PREDICTED: sodium- and chloride-dependent glycine transporter 1 [Stegastes partitus]
Opl0035730.1	62.2809	1.56543	5.3142	2.59e-07	6.98e-05	gnl|BL_ORD_ID|117645 sp|Q9BXX0|EMIL2_HUMAN EMILIN-2 OS=Homo sapiens OX=9606 GN=EMILIN2 PE=1 SV=3//2.49201e-70
